# 1 Intra-host Variation and Evolutionary Dynamics of SARS-CoV-2

## 2 Population in COVID-19 Patients

3  
4 **Running Title:** SARS-CoV-2 Variation in COVID-19 Patients

5  
6 Yanqun Wang<sup>1#</sup>, Daxi Wang<sup>2,3#</sup>, Lu Zhang<sup>4#</sup>, Wanying Sun<sup>2,3,5#</sup>, Zhaoyong Zhang<sup>1#</sup>, Weijun  
7 Chen<sup>5,6#</sup>, Airu Zhu<sup>1#</sup>, Yongbo Huang<sup>1#</sup>, Fei Xiao<sup>7</sup>, Jinxiu Yao<sup>8</sup>, Mian Gan<sup>1</sup>, Fang Li<sup>1</sup>, Ling Luo<sup>1</sup>,  
8 Xiaofang Huang<sup>1</sup>, Yanjun Zhang<sup>1</sup>, Sook-san Wong<sup>1</sup>, Xinyi Cheng<sup>2,9</sup>, Jingkai Ji<sup>2,3,10</sup>, Zhihua Ou<sup>2,3</sup>,  
9 Minfeng Xiao<sup>2,3</sup>, Min Li<sup>2,3,5</sup>, Jiandong Li<sup>2,3,5</sup>, Peidi Ren<sup>2,3</sup>, Ziqing Deng<sup>2,3</sup>, Huanzi Zhong<sup>2,3</sup>,  
10 Huanming Yang<sup>2,11</sup>, Jian Wang<sup>2,11</sup>, Xun Xu<sup>2,12</sup>, Tie Song<sup>13</sup>, Chris Ka Pun Mok<sup>1,14</sup>, Malik Peiris<sup>1,14</sup>,  
11 Nanshan Zhong<sup>1</sup>, Jingxian Zhao<sup>1\*</sup>, Yimin Li<sup>1\*</sup>, Junhua Li<sup>2,3,9\*</sup>, Jincun Zhao<sup>1,4\*</sup>

12  
13 <sup>1</sup>State Key Laboratory of Respiratory Disease, National Clinical Research Center for Respiratory  
14 Disease, Guangzhou Institute of Respiratory Health, the First Affiliated Hospital of Guangzhou  
15 Medical University, Guangzhou, Guangdong, 510120, China.

16 <sup>2</sup>BGI-Shenzhen, Shenzhen, 518083, China.

17 <sup>3</sup>Shenzhen Key Laboratory of Unknown Pathogen Identification, BGI-Shenzhen, Shenzhen,  
18 518083, China.

19 <sup>4</sup>Institute of Infectious disease, Guangzhou Eighth People's Hospital of Guangzhou Medical  
20 University, Guangzhou, Guangdong, 510060, China.

21 <sup>5</sup>BGI Education Center, University of Chinese Academy of Sciences, Shenzhen, 518083, China.

22 <sup>6</sup>BGI PathoGenesis Pharmaceutical Technology Co., Ltd , BGI-Shenzhen, Shenzhen, 518083,  
23 China.

24 <sup>7</sup>Department of Infectious Diseases, Guangdong Provincial Key Laboratory of Biomedical  
25 Imaging, Guangdong Provincial Engineering Research Center of Molecular Imaging. The Fifth  
26 Affiliated Hospital, Sun Yat-sen University, Zhuhai, Guangdong, 519000, China.

27 <sup>8</sup>Yangjiang People's Hospital, Yangjiang, Guangdong, China.

28 <sup>9</sup>School of Biology and Biological Engineering, South China University of Technology,  
29 Guangzhou, China.

30 <sup>10</sup>School of Future Technology, University of Chinese Academy of Sciences, Beijing 101408,  
31 China.

32 <sup>11</sup>James D. Watson Institute of Genome Science, Hangzhou, 310008, China.

33 <sup>12</sup>Guangdong Provincial Key Laboratory of Genome Read and Write, BGI-Shenzhen, Shenzhen,  
34 518120, China.

35 <sup>13</sup>Guangdong Provincial Center for Disease Control and Prevention, Guangzhou, Guangdong,  
36 511430, China.

37 <sup>14</sup>The HKU–Pasteur Research Pole, School of Public Health, Li Ka Shing Faculty of Medicine,  
38 the University of Hong Kong, Hong Kong SAR, 19406, China.

39

40 #These authors contributed equally to this work.

41

42 \*Corresponding authors

43 Dr. Jincun Zhao, [zhaojincun@gird.cn](mailto:zhaojincun@gird.cn)

44 Dr. Junhua Li, [lijunhua@genomics.cn](mailto:lijunhua@genomics.cn)

45 Dr. Yimin Li, [dryiminli@vip.163.com](mailto:dryiminli@vip.163.com)

46 Dr. Jingxian Zhao, [zhaojingxian@gird.cn](mailto:zhaojingxian@gird.cn)

47

48 **Keywords:** SARS-CoV-2, COVID-19, Intra-host, Variation

49 **ABSTRACT**

50 As of middle May 2020, the causative agent of COVID-19, SARS-CoV-2, has infected over 4  
51 million people with more than 300 thousand death as official reports<sup>1,2</sup>. The key to  
52 understanding the biology and virus-host interactions of SARS-CoV-2 requires the knowledge of  
53 mutation and evolution of this virus at both inter- and intra-host levels. However, despite quite a  
54 few polymorphic sites identified among SARS-CoV-2 populations, intra-host variant spectra and  
55 their evolutionary dynamics remain mostly unknown. Here, using deep sequencing data, we  
56 achieved and characterized consensus genomes and intra-host genomic variants from 32 serial  
57 samples collected from eight patients with COVID-19. The 32 consensus genomes revealed the  
58 coexistence of different genotypes within the same patient. We further identified 40 intra-host  
59 single nucleotide variants (iSNVs). Most (30/40) iSNVs presented in single patient, while ten  
60 iSNVs were found in at least two patients or identical to consensus variants. Comparison of  
61 allele frequencies of the iSNVs revealed genetic divergence between intra-host populations of  
62 the respiratory tract (RT) and gastrointestinal tract (GIT), mostly driven by bottleneck events  
63 among intra-host transmissions. Nonetheless, we observed a maintained viral genetic diversity  
64 within GIT, showing an increased population with accumulated mutations developed in the  
65 tissue-specific environments. The iSNVs identified here not only show spatial divergence of  
66 intra-host viral populations, but also provide new insights into the complex virus-host  
67 interactions.

68

69 **MAIN**

70 From January 25 to February 10 in 2020, we collected a total of 62 serial clinical samples from  
71 eight hospitalized patients (GZMU cohort) confirmed with SARS-CoV-2 infection using real-time  
72 RT-qPCR (**Table S1**). All patients had direct contacts with confirmed cases during the early  
73 stage of the outbreak. Most patients, except P15 and P62, had severe symptoms and received  
74 mechanical ventilation in ICU, including the patient P01 who passed away eventually. The

75 patient P01 also showed much lower antibody (IgG and IgM) responses (**Table S1**) compared  
76 to other patients. We then deep sequenced the 62 clinical samples using metatranscriptomic  
77 and/or hybrid capture methods (**Table S1**). The numbers of SARS-CoV-2 reads per million  
78 (SARS-CoV-2 RPM) among the metatranscriptomic data correlated well with the corresponding  
79 RT-qPCR cycle threshold (Ct), reflecting a robust estimation of viral load ( $R = 0.71$ ,  $P = 6.7e-11$ )  
80 (**Fig. 1a**). The respiratory tract (RT: Nose, Sputum, Throat) and gastrointestinal tract (GIT: Anus,  
81 Feces) samples showed higher SARS-CoV-2 RPMs compared to gastric mucosa and urine  
82 samples (**Fig. 1b**). Furthermore, RT and GIT samples from two patients with mild symptoms  
83 showed relatively low viral loads among their respective sample types. The data here may  
84 reflect an active replication of SARS-CoV-2 in RT and GIT, especially in patients with severe  
85 symptoms<sup>3,4</sup>.

86 Here, using metatranscriptomic data, we obtained 32 consensus complete genomes  
87 from the clinical samples with at least 60-fold sequence coverage (**Table S1 and Table S2**).  
88 Comparing the assemblies to the reference sequence (GISAID accession: EPI\_ISL\_402119)  
89 revealed 14 consensus variants (6 synonymous and 8 non-synonymous) located mostly in  
90 ORF1ab, S and N genes (**Table S2**). Most of the consensus variants were also detected among  
91 public sequences, including the widespread associated variants (C8782T and T28144C)  
92 detected in four patients (P10, P13, P14 and P62). The novel consensus variant causes a  
93 frameshift at the end of ORF8 in the patient P14, showing the phenotypic plasticity during the  
94 evolution of SARS-CoV-2. Evolutionary relationships showed that the consensus SARS-CoV-2  
95 genomes of the GZMU cohort belonged to distinct clades, including clades defined by T28144C  
96 and A23403G, respectively (**Fig. 1c**). Remarkably, we observed distinct SARS-CoV-2 genomes  
97 co-existed in the GIT samples of the patient (P08) with three nucleotide differences (**Fig. 1d and**  
98 **Table S2**), suggesting independent replications of different SARS-CoV-2 genotypes within the  
99 same host<sup>5</sup>.

100           Although plenty of polymorphic sites were identified among SARS-CoV-2 populations,  
101 intra-host variant spectra of closely related viral genomes are mostly disguised by the  
102 consensus sequences. We firstly examined the reproducibility of our experimental procedures  
103 for allele frequency identification. Only a minor difference of alternative allele frequencies (AAFs)  
104 was observed among biological replicates of two selected samples (**Fig. S1**), showing that the  
105 estimated population composition was marginally affected by independent experimental  
106 procedures. To control false discovery rate, we applied a stringent approach to detect iSNVs.  
107 The iSNVs were identified from the 32 samples using metatranscriptomic data and then verified  
108 using hybrid capture data, which are available for most (27/32) samples (**Table S3 and Table**  
109 **S4**). Overall, we observed 1 to 23 iSNVs in six patients with a cut-off of 5% minor allele  
110 frequency (**Fig. 2a and Fig. 2b**). When an iSNV was discovered in one patient, we reduced the  
111 cut-off to 2% to detect that iSNV from the rest samples of the same patient (see methods). The  
112 AAFs of iSNVs detected from the metagenomic data correlated well with those of the hybrid  
113 capture data (Spearman's  $\rho = 0.99$ ,  $P < 2.2e-16$ ; **Fig. S2**). Furthermore, the numbers of the  
114 observed iSNVs did not correlate with the sequencing coverage (**Fig. S3**), suggesting that the  
115 coverage of metatranscriptomic data was sufficient to estimate intra-host variation in most  
116 samples.

117           We further analyzed intra-host variation across genes for evidence of natural selection.  
118 Overall, the 40 identified iSNV sites (10 synonymous iSNVs and 30 non-synonymous iSNVs)  
119 distributed evenly across genomic regions (**Fig. 2c; Table S3**). High proportion of non-  
120 synonymous iSNVs suggests that most iSNVs were either under frequent positive selection or  
121 insufficient purifying selection. However, we did not observe significant difference in AAFs  
122 between non-synonymous and synonymous iSNVs (**Fig. 2d**) and among codon positions (**Fig.**  
123 **S4**), indicating a relaxed intra-host selection. It is likely that most of those non-synonymous  
124 iSNVs will be removed by purifying selection and/or genetic drift in a longer timescale<sup>6</sup>.

125 Nonetheless, the exact functional and evolutionary relevance of the intra-host variants remain to  
126 be explored.

127 One central task when estimating intra-host variation is to identify the source of iSNVs.  
128 Overall, the distribution of the iSNVs among samples does not correlate well with the consensus  
129 SNPs (**Fig. 2a**). Samples carrying the same consensus SNPs generally had different iSNVs,  
130 particularly in P01, P10 and P13. Here, we classified the iSNVs into i) rare iSNVs (30/40)  
131 detected in a single patient, and ii) common iSNVs (10/40) detected in at least two patients  
132 and/or identical to consensus variants. The ten common iSNVs did not show significant higher  
133 AAFs than the rare iSNVs (**Fig. 2e**). Notably, the ten common iSNVs include two iSNVs  
134 (G11083T and C21711T) exclusively detected in the GIT populations of P01, P08 and P10  
135 (**Table S4**). Among the common iSNVs, G11083T is the most widespread consensus variant  
136 distributed in multiple lineages of SARS-CoV-2, suggesting that it might derive from recurring  
137 mutations on distinct strains rather than the mutation on a single ancestral strain. Interestingly,  
138 although G11083T was detected as an intra-host variant in the GIT samples of three patients, it  
139 was not detected in the corresponding RT samples, indicating a recurrent mutation of this loci,  
140 especially in the GIT population. Interestingly, G11083T locate in a region encoding a predicted  
141 T-cell epitope<sup>7</sup>, suggesting that recurrent mutation may provide genetic plasticity to better adapt  
142 against host defenses.

143 Using Shannon entropy, we observed a significantly higher genetic diversity within the  
144 GIT samples than that of RT samples (Wilcoxon rank-sum test,  $P = 1.4e-05$ ; **Fig. 3a and Table**  
145 **S5**), reflecting an increased viral population size within the GIT samples. We further investigated  
146 the genetic differentiation between the two places. Notably, no iSNVs was shared between RT  
147 and GIT samples from the same patients, suggesting a clear genetic divergence among intra-  
148 host viral populations. Here we used L1-norm distance to estimate genetic dissimilarity among  
149 samples based on iSNVs and their AAFs and compared that between samples within and  
150 among hosts (**Fig. 3b and Table S6**). As expected, genetic distances among samples from the

151 same host were smaller than those among inter-host samples (**Fig. 3b and Table S6**). Within  
152 each host, the greatest genetic differentiation was observed among GIT samples and between  
153 GIT and RT samples, while the differentiation among RT samples was relatively small. For  
154 example, seven iSNVs were shared among the GIT samples of P01, while none of them was  
155 observed in RT samples (**Fig. 2a**). It seems that the frequent genetic divergence between GIT  
156 and RT populations is mostly driven by bottleneck events during distant intra-host transmissions.  
157 However, the exact interaction mechanisms among intra-host populations require further  
158 investigation.

159 Previous studies have revealed longitudinal evolution of intra-host populations in some  
160 important RNA viruses<sup>8-10</sup>. We firstly compared the detected iSNVs among serial samples. All  
161 the iSNVs of early GIT samples also presented in later GIT samples, while all the iSNVs  
162 detected in RT samples disappeared in the following samples, suggesting that the viral genetic  
163 diversity is better maintained in GIT. We further focused on the allele frequency dynamics of  
164 GIT iSNVs of P01 and P08, respectively. Notably, most GIT iSNVs were remarkably stable and  
165 showed continuous trends of AAFs across sampling dates. For example, within the GIT  
166 population of P01, seven iSNVs showed continuous trends of allele frequency dynamics,  
167 including four iSNVs with increased AAFs and two iSNVs with decreased AAFs across the three  
168 sampling dates (**Fig. 4a**). Given their similar growth rates but distinct allele frequencies, it is  
169 likely that more than two genetically related haplotypes co-existed in within P01. Similar patterns  
170 were also observed in the GIT population of P08 (**Fig. 4b**). Notably, the dynamics of intra-host  
171 variants changed the consensus allele (>50%) of three genomic loci (3160, 21711 and 28854)  
172 of P08. Taken together, the iSNVs and their frequencies suggest that the viral populations in  
173 GIT is more stable than those in RT. Nonetheless, in both P01 and P08, we observed increased  
174 AAFs of C21711T and G11083T, suggesting that these two variants might be adaptively  
175 selected, especially in the GIT. Whether viral adaptation is involved in the intra-host divergence  
176 among distant populations warrants further investigation.

177 We further phased the proximal iSNVs into local haplotypes using paired-end mapped  
178 reads (**Table S7**). Most minor haplotypes had one nucleotide difference from the dominant  
179 haplotype of the same sample, suggesting that they might derive from the main strain of the  
180 population. Nonetheless, we observed one exception in the GIT population of P01, covering the  
181 variable sites of C21707T, C21711T and A21717G (**Fig. S5**). With the cut-off of 1%, one  
182 dominant haplotype (T-C-A) and two minor haplotypes (T-T-A and T-T-G) were identified.  
183 Despite that minor haplotype (T-T-A) was relatively stable (8%–10%), the proportion of the  
184 dominant haplotype (T-C-A) decreased from 89% to 67%, while that of the minor haplotype (T-  
185 T-G) increased from 2% to 22%. Based on the dynamics and nucleotide differences among  
186 three haplotypes, we hypothesized that the minor haplotype (T-T-G) may derive from the  
187 dominant haplotype (T-C-A) via the intermediate haplotype (T-T-A), showing a maintained  
188 diversity within GIT population. More importantly, our observation supports that the mutated  
189 viruses are capable to replicate and hence, accumulate more variants within GIT of the same  
190 host, leading to an increased genetic diversity in the tissue specific environment.

191 Given the observations in patients with influenza<sup>8</sup>, stochastic process is the dominant  
192 factor driving the intra-host population dynamics, which is especially the case during distant  
193 intra-host transmissions. For SARS-CoV-2, one possible intra-host transmission route is from  
194 the respiratory tract to the gastrointestinal epithelia. During the intra-host transmission,  
195 population composition may change dramatically through random sampling when a novel sub-  
196 population was established from a small group of viruses of a larger population<sup>13</sup>. This is  
197 supported by the genetic divergence of intra-host variants between RT and GIT populations.  
198 The stochastic process between and within intra-host populations seems to also attenuate the  
199 efficacy of intra-host purifying selection, as shown by the even distribution of AAFs among  
200 synonymous and non-synonymous iSNVs. However, under the traditional genetic population  
201 theories, novel founder populations are expected to have a low genetic variation due to the  
202 subsampling from the original population. In contrast, viral populations in GIT showed a higher



203 genetic diversity than those in RT, reflecting a larger effective viral population size in the GIT.  
204 This result is also consistent with the high viral load in GIT (**Fig. 1b**). During the viral replication,  
205 both RT and GIT populations showed evidence of generating intra-host variants. Our findings  
206 further demonstrated that those novel and/or recurrent intra-host variants are better maintained  
207 within GIT, and hence, leading to a higher level of genetic diversity and potentially larger  
208 effective population size in GIT. In contrast, the intra-host variants seemed to be less stable in  
209 RT, probably associated with a more dramatic genetic drift in RT populations. Differences in  
210 other factors, such as host-cell entry, immune responses and microbial communities among  
211 tissue specific environments, may further drive the structuring among intra-host population. On  
212 the other hand, those differences may also drive viral adaptation, given the two GIT specific  
213 non-synonymous iSNVs observed in our study. However, it is still challenging to fully  
214 disentangle the influences of stochastic processes and natural selection, considering the  
215 frequent confounding genetic signals of these two processes.

216 Intra-host variants were identified in many RNA viruses<sup>8,9,11-14</sup>. Here, using deep  
217 sequencing data of serial samples, we revealed the existence of intra-host variation within  
218 COVID-19 patients, which is likely to be contributed by novel and/or recurring intra-host  
219 mutations. Furthermore, our observation demonstrated a frequent genetic divergence between  
220 GIT and RT samples, mostly driven by bottleneck events among intra-host transmissions.  
221 Nonetheless, we observed a maintained viral genetic diversity within GIT, reflecting an  
222 increased population with accumulated mutations developed in the tissue-specific environments.  
223 Exact biological mechanisms of the intra-host population dynamics remain to be explored in  
224 future. Our data presented here also reflects the evolutionary capacity of SARS-CoV-2 in  
225 developing viral escape and drug resistance during infection. More broadly, these data provide  
226 new insights into the complex virus-host interactions.

227

228

## 229 **METHODS**

### 230 **Patient enrollment and Ethics statement**

231 Eight pneumonia patients, referred as GZMU cohort, were confirmed with SARS-CoV-2  
232 infection between January 25 to February 10 in 2020 and hospitalized at the first affiliated  
233 hospital of Guangzhou Medical University (six patients), the fifth affiliated hospital of Sun Yat-  
234 sen University (one patient), and Yangjiang People's Hospital (one patient). Serial samples  
235 were collected, including nasal swabs, throat swabs, sputum, gastric mucosa, urine, plasma,  
236 anal swabs and feces. The overall research plan was reviewed and approved by the Ethics  
237 Committees of all the three hospitals. All the information regarding patients has been  
238 anonymized.

239

### 240 **Real-time RT-qPCR and Metatranscriptomic sequencing**

241 A total of 62 serial clinical samples collected from eight patients with COVID-19 (**Table S1**) were  
242 used for Real-time RT-qPCR. Clinical samples were subjected to RNA extraction using QIAamp  
243 Viral RNA Mini Kit (Qiagen, Hilden, Germany). An in-house real-time RT-qPCR was performed  
244 by targeting the SARS-CoV-2 RdRp and N gene regions (Zybio Inc.). Human DNA was  
245 removed using DNase I and RNA concentration was measured using Qubit RNA HS Assay Kit  
246 (Thermo Fisher Scientific, Waltham, MA, USA). DNA-depleted and purified RNA was used to  
247 construct double-stranded DNA library using MGIEasy RNA Library preparation reagent set  
248 (MGI, Shenzhen, China) following the protocol described in our previous study<sup>15</sup>. High  
249 throughput sequencing of the constructed libraries was then carried out on the DNBSEQ-T7  
250 platform (MGI, Shenzhen, China) to generate metatranscriptomic data of 100bp long paired-end  
251 reads.

252

### 253 **Hybrid capture-based enrichment and sequencing**

254 For a subset of samples (**Table S1**), genomic content of SARS-CoV-2 was enriched from the  
255 double-stranded DNA libraries mentioned above using the 2019-nCoVirus DNA/RNA Capture  
256 Panel (BOKE, Jiangsu, China) as described in our previous study<sup>15</sup>. The SARS-CoV-2 content  
257 enriched samples were used to construct DNA Nanoballs (DNBs) based libraries, which were  
258 then sequenced using the same protocol described above.

259

## 260 **Data filtering and Genome assembly**

261 Data filtering was performed following the procedures described in previous research<sup>15</sup>. Briefly,  
262 for both metatranscriptomic and hybrid capture data, sequence data of each sample were firstly  
263 mapped to a pre-defined database comprising representative genomes of coronaviridae. The  
264 mapped reads were then subject to the removal of low-quality, duplications, adaptor  
265 contaminations and low-complexity to collect high quality coronaviridae-like reads. We also  
266 compared the allele frequencies among the two data types when available, samples with  
267 conflicted consensus alleles were removed. For the samples with 60-fold of metatranscriptomic  
268 data, coronaviridae-like metatranscriptomic reads were used to generate consensus genomes  
269 and identify intra-host variants. Full-length consensus genomes were generated from reads  
270 mapped to the reference genome (GISAID accession: EPI\_ISL\_402119) using Pilon (v. 1.23)<sup>16</sup>.  
271 To prevent false discovery, base positions reporting an alternative allele with the following  
272 conditions were masked as N: 1) sequencing coverage less than 5-fold; 2) sequencing  
273 coverage less than 10-fold and the proportion of reads with the alternative allele less than 80%.  
274 The collected coronaviridae-like reads were also de novo assembled using SPAdes (v. 3.14.0)  
275 with default settings<sup>17</sup> with a maximum of 100-fold coverage of read data. Structural variations  
276 between the de novo assemblies and consensus genomes, if any, were manually checked and  
277 resolved based on read alignments. Nucleotide differences between the consensus sequences  
278 and the reference genome were summarized into artificial Variant Call Format (VCF) files, which  
279 were annotated using SnpEff (v.2.0.5)<sup>18</sup> with default settings.

280

## 281 **Phylogenetic analysis**

282 Available consensus sequences of SARS-CoV-2 (**Table S8**) were collected from GISAID  
283 database (<https://www.gisaid.org/>) on 5th April, 2020, after the removal of highly homologous  
284 sequences, 122 representative virus strains (**Table S8**) were used to infer evolutionary  
285 relationships with the assembled genomes. Within the GZMU cohort, only one genome was  
286 selected when more than one identical genome was achieved from the same patient. The  
287 assembled SARS-CoV-2 and selected representative genomes were aligned using MAFFT with  
288 default settings. A maximum likelihood (ML) tree was inferred using the software IQ-TREE  
289 (v.1.6.12)<sup>19</sup>, with the best fit nucleotide substitution model selected by ModelFinder from the  
290 same software. The inferred ML tree was then visualized using the R package ggtree<sup>20</sup> (v.3.10).  
291 Major branches and the defining nucleotide mutations were manually labelled.

292

## 293 **Summary of public consensus variants**

294 All the consensus sequences of the public strains were aligned with the reference genome  
295 (GISAID accession: EPI\_ISL\_402119) using MAFFT (v.5.3)<sup>21</sup> with default settings. Nucleotide  
296 differences between the consensus sequences and the reference genome were summarized  
297 into an artificial VCF file, which was then annotated using SnpEff (v.2.0.5) with default  
298 settings. The linkage disequilibrium among the identified consensus variants were estimated  
299 using VCFtools (v.0.1.16).

300

## 301 **Calling of iSNVs**

302 Here, an intra-host single nucleotide variant (iSNV) was defined as the alternative allele co-  
303 existed with the reference allele at identical genomic position within the same sample. To  
304 minimize false discovery, iSNVs were identified on samples with at least 60-fold mean

305 metatranscriptomic sequencing coverage and then verified using hybrid-capture data when  
306 available.

307 First, paired-end metatranscriptomic reads were mapped to the reference genome  
308 (GISAID accession: EPI\_ISL\_402119) using BWA aln (v.0.7.16) with default parameters<sup>22</sup>.  
309 Duplicated reads were marked using Picard MarkDuplicates (v. 2.10.10)  
310 (<http://broadinstitute.github.io/picard>) with default settings. Base composition of each position  
311 was summarized from the mapped reads using the software pysamstats (v. 1.1.2)  
312 (<https://github.com/alimanfoo/pysamstats>), and then subject to iSNV site identification with  
313 following criteria: 1) base quality larger than 20; 2) sequencing coverage of paired-end mapped  
314 reads  $\geq 10$ ; 3) at least five reads support the minor allele 4) minor allele frequency  $\geq 5\%$ ; 5)  
315 strand bias ratio of reads with the minor allele and reads with major allele less than ten-fold. To  
316 minimize false discoveries, sites with more than one alternative allele were filtered out.  
317 Biological effects of the identified iSNVs were annotated using the SnpEff (v.2.0.5) with default  
318 settings. Alternative allele frequencies (AAFs) at the identified iSNV sites were measured by the  
319 proportion of paired-end mapped reads with alternative alleles. When an iSNV was detected in  
320 one patient, the detection cut-off of that iSNV was reduced to 2% for the rest samples of the  
321 same patient. Only the AAFs more than 2% with at least three reads were kept for the following  
322 analyses. All the iSNVs were verified using hybrid capture data when available. At the iSNV  
323 sites, the allele with higher frequency was defined as major allele, while one with less frequency  
324 was defined as minor allele, regardless whether it is different from the reference allele. A  
325 heatmap was generated to visualize the AAFs for all samples using the pheatmap package in R  
326 (v.3.6.1). A subset of the identified iSNVs were validated by Sanger sequencing using the  
327 protocol described in previous study<sup>15</sup>.

328

329 **Statistics of iSNVs**

330 The distribution of iSNVs among genetic components and patients were summarized and  
331 visualized using the Python package matplotlib (v.3.2.1). Alternative allele frequencies on all  
332 the detected iSNV sites were compared among patients. To avoid oversampling, for the patient  
333 with more than sample, only the median AAF among all samples of that patient was used for  
334 comparison. Alternative allele frequencies among synonymous and nonsynonymous variants  
335 and among codon positions were compared using Wilcoxon rank sum test and visualized  
336 through boxplot using the R package ggplot (v.3.3.0). For the iSNVs detected in patient P01 and  
337 P08, the dynamics of AAFs was visualized across time points using the R package ggplot  
338 (v.3.3.0).

339

#### 340 **Genetic diversity**

341 Genetic diversity of each sample was estimated using Shannon entropy based on the AAF of  
342 each iSNV, assuming that all iSNVs are independent from each other.

$$H(x) = - \sum_i^n P(i) \log_2 P(i)$$

343 where  $P(i)$  is the AAF at variable site  $i$ .

344

#### 345 **Genetic distance**

346 The genetic distance among samples was estimated using L1-norm distance in a pairwise  
347 manner.

$$D = \sum_{k=1}^N \sum_{i=1}^n |p_i - q_i|$$

348 The L1-norm distance ( $D$ ) between a pair of samples is the sum of distance across all the  
349 variable sites ( $N$ ). For each variable site, the distance is calculated between vectors ( $p$  and  $q$  for  
350 each sample) comprising frequencies of all the four possible nucleotide bases ( $n = 4$ ).

351

## 352 **Haplotype reconstruction**

353 Haplotypes of neighbor iSNV sites were reconstructed using mapped paired end reads.

354

## 355 **DATA AVAILABILITY**

356 Sequence data used in this study have been deposited in CNGB (<https://db.cngb.org/>) under

357 Project accession CNP0001004 and CNP0000997.

358

## 359 **DISCLOSURE STATEMENT**

360 No conflict of interest was reported by the authors.

361

## 362 **ACKNOWLEDGEMENTS**

363 This study was approved by the Health Commission of Guangdong Province to use patients'

364 specimen for this study. This study was funded by grants from The National Key Research and

365 Development Program of China (2018YFC1200100, 2018ZX10301403, 2018YFC1311900), the

366 emergency grants for prevention and control of SARS-CoV-2 of Ministry of Science and

367 Technology (2020YFC0841400) and Guangdong province (2020B1111108001,

368 2018B020207013, 2020B111112003), the Guangdong Province Basic and Applied Basic

369 Research Fund (2020A1515010911), Guangdong Science and Technology Foundation

370 (2019B030316028), Guangdong Provincial Key Laboratory of Genome Read and Write

371 (2017B030301011), Guangzhou Medical University High-level University Innovation Team

372 Training Program (Guangzhou Medical University released [2017] No.159), National Natural

373 Science Foundation of China (81702047, 81772191, 91842106 and 8181101118), State Key

374 Laboratory of Respiratory Disease (SKLRD-QN-201715, SKLRD-QN-201912 and SKLRD-Z-

375 202007). We thank the authors for submitting the genome sequences to GISAID. We thank the

376 Guangdong Provincial Key Laboratory of Genome Read and Write and China National  
377 GeneBank at Shenzhen for providing sequencing service. We thank the patients who took part  
378 in this study.

379

#### 380 **AUTHOR CONTRIBUTIONS**

381 J.Z., J.L., Y.L and J.Z conceived the study, Y.W et al collected clinical specimen and executed  
382 the experiments. D.W., W.S., X.C. and J.J. analyzed the data. All the authors participated in  
383 discussion and result interpretation. D.W., Y.W., M.P. and J.Z. wrote the manuscript. All authors  
384 revised and approved the final version.

385

#### 386 **DISCLOSURE STATEMENT**

387 No conflict of interest was reported by the authors

388



## 389 REFERENCES

- 390 1 Zhou, P. *et al.* A pneumonia outbreak associated with a new coronavirus of probable bat  
391 origin. *Nature* **579**, 270-273, doi:10.1038/s41586-020-2012-7 (2020).
- 392 2 Velavan, T. P. & Meyer, C. G. The COVID-19 epidemic. *Trop. Med. Int. Health* **25**, 278-  
393 280, doi:10.1111/tmi.13383 (2020).
- 394 3 Wang, W. *et al.* Detection of SARS-CoV-2 in Different Types of Clinical Specimens.  
395 *Jama*, doi:10.1001/jama.2020.3786 (2020).
- 396 4 Chen, W. *et al.* Detectable 2019-nCoV viral RNA in blood is a strong indicator for the  
397 further clinical severity. *Emerging microbes & infections* **9**, 469-473,  
398 doi:10.1080/22221751.2020.1732837 (2020).
- 399 5 Wölfel, R. *et al.* Virological assessment of hospitalized patients with COVID-2019.  
400 *Nature*, doi:10.1038/s41586-020-2196-x (2020).
- 401 6 Domingo, E., Sheldon, J. & Perales, C. Viral quasispecies evolution. *Microbiol. Mol.*  
402 *Biol. Rev.* **76**, 159-216, doi:10.1128/mmbr.05023-11 (2012).
- 403 7 Grifoni, A. *et al.* A Sequence Homology and Bioinformatic Approach Can Predict  
404 Candidate Targets for Immune Responses to SARS-CoV-2. *Cell host & microbe* **27**, 671-  
405 680.e672, doi:10.1016/j.chom.2020.03.002 (2020).
- 406 8 McCrone, J. T., Woods, R. J., Martin, E. T. & Malosh, R. E. Stochastic processes  
407 constrain the within and between host evolution of influenza virus. **7**,  
408 doi:10.7554/eLife.35962 (2018).
- 409 9 Bull, R. A. *et al.* Contribution of intra- and interhost dynamics to norovirus evolution.  
410 *Journal of virology* **86**, 3219-3229, doi:10.1128/jvi.06712-11 (2012).
- 411 10 Orton, R. J. & Wright, C. F. Estimating viral bottleneck sizes for FMDV transmission  
412 within and between hosts and implications for the rate of viral evolution. **10**, 20190066,  
413 doi:10.1098/rsfs.2019.0066 (2020).
- 414 11 Gire, S. K. *et al.* Genomic surveillance elucidates Ebola virus origin and transmission  
415 during the 2014 outbreak. *Science* **345**, 1369-1372, doi:10.1126/science.1259657 (2014).
- 416 12 Chen, C. *et al.* Phylogenomic analysis unravels evolution of yellow fever virus within  
417 hosts. **12**, e0006738, doi:10.1371/journal.pntd.0006738 (2018).
- 418 13 Grubaugh, N. D. *et al.* Genetic Drift during Systemic Arbovirus Infection of Mosquito  
419 Vectors Leads to Decreased Relative Fitness during Host Switching. *Cell host & microbe*  
420 **19**, 481-492, doi:10.1016/j.chom.2016.03.002 (2016).
- 421 14 Andersen, K. G. *et al.* Clinical Sequencing Uncovers Origins and Evolution of Lassa  
422 Virus. *Cell* **162**, 738-750, doi:10.1016/j.cell.2015.07.020 (2015).
- 423 15 Xiao, M. *et al.* Multiple approaches for massively parallel sequencing of HCoV-19  
424 genomes directly from clinical samples. *bioRxiv*, 2020.2003.2016.993584,  
425 doi:10.1101/2020.03.16.993584 (2020).
- 426 16 Walker, B. J. *et al.* Pilon: an integrated tool for comprehensive microbial variant  
427 detection and genome assembly improvement. *PLoS One* **9**, e112963,  
428 doi:10.1371/journal.pone.0112963 (2014).
- 429 17 Bankevich, A. *et al.* SPAdes: a new genome assembly algorithm and its applications to  
430 single-cell sequencing. *J. Comput. Biol.* **19**, 455-477, doi:10.1089/cmb.2012.0021 (2012).
- 431 18 Cingolani, P. *et al.* A program for annotating and predicting the effects of single  
432 nucleotide polymorphisms, SnpEff: SNPs in the genome of *Drosophila melanogaster*  
433 strain w1118; iso-2; iso-3. *Fly* **6**, 80-92, doi:10.4161/fly.19695 (2012).

- 434 19 Nguyen, L. T., Schmidt, H. A., von Haeseler, A. & Minh, B. Q. IQ-TREE: a fast and  
435 effective stochastic algorithm for estimating maximum-likelihood phylogenies.  
436 *Molecular biology and evolution* **32**, 268-274, doi:10.1093/molbev/msu300 (2015).
- 437 20 Yu, G., Smith, D. K., Zhu, H., Guan, Y. & Lam, T. T.-Y. ggtree: an r package for  
438 visualization and annotation of phylogenetic trees with their covariates and other  
439 associated data. *Methods Ecol. Evol.* **8**, 28-36, doi:10.1111/2041-210x.12628 (2017).
- 440 21 Katoh, K., Kuma, K., Toh, H. & Miyata, T. MAFFT version 5: improvement in accuracy  
441 of multiple sequence alignment. *Nucleic Acids Res.* **33**, 511-518, doi:10.1093/nar/gki198  
442 (2005).
- 443 22 Li, H. & Durbin, R. Fast and accurate long-read alignment with Burrows-Wheeler  
444 transform. *Bioinformatics* **26**, 589-595, doi:10.1093/bioinformatics/btp698 (2010).
- 445
- 446

447 **FIGURE LEGEND**

448 **Figure 1. Sequence data from various sample types of patients with COVID-19**

449 **a**, SARS-CoV-2 RPM of meta-transcriptomic data plotted against RT-qPCR cycle threshold (Ct)  
450 value for the clinical samples. **b**, Frequency distribution of samples based on SARS-CoV-2  
451 reads per million (SARS-CoV-2 RPM). **c**, Maximum likelihood tree of consensus SARS-CoV-2  
452 genomes using IQ-TREE (1,000 bootstrap replicates). Colors of dotted tips represent  
453 geographic locations of samples. Node labels represent bootstrap values for each branch.  
454 Nucleotide mutations that defines the branch were labelled outside the tree. **d**, Distribution of  
455 consensus variants (in round circles) detected in GZMU cohort across the SARS-CoV-2  
456 genome. Colors represent the biological effect of mutations. Non-synonymous variants are  
457 denoted by green, synonymous variants by red, and frameshift by blue. EPI\_ISL\_402119 was  
458 used as the reference sequence.

459

460 **Figure 2. Characteristics of iSNVs.**

461 **a**, Heatmap showing the alternative allele frequencies (AAFs) of intra-host single nucleotide  
462 variants (iSNVs) and consensus variants among samples. The sample (e.g P01N0129) name  
463 indicates patient number P01, sample type (N nasal swab, T throat swab, A anal swab, F feces,  
464 S sputum) and collection date (01-27). **b**, The number of detected iSNVs per patient. **c**, Number  
465 of iSNV sites among protein-encoding genes. **d**, Box plot showing the distribution of alternative  
466 allele frequencies (AAFs) of non-synonymous and synonymous iSNVs. Each dot indicates the  
467 median AAF among all the detected iSNVs of samples from same patient. **e**, Box plot showing  
468 the distribution of AAFs of common and rare iSNVs. Each dot indicates the median AAF among  
469 all the detected iSNVs of samples from same patient.

470

471 **Figure 3. Dynamics of iSNVs detected in SARS-CoV-2 infected patients.**

472 **a**, Box plot showing the distribution of genetic diversity among samples from gastrointestinal  
473 tract (GIT) and respiratory tract (RT). **b**, Box plot showing the distribution of L1-norm distances  
474 among samples from gastrointestinal tract (GIT) and respiratory tract (RT). Each dot represents  
475 the genetic distance between a unique pair.

476

477 **Figure 4. Temporal dynamics of intra-host populations in patient P01 and P08.**

478 **a-b**, Alternative allele frequencies (AAFs) among sampling dates in patient P01 and P08. Days  
479 post the first symptom date are shown in bracket. Combined iSNVs are the average frequency  
480 of four similar iSNVs (A391T, A2275G, C25163A and T27817G). Colours represent different  
481 iSNVs. Underlines represent common iSNVs.

482

## 483 **SUPPLEMENTARY INFORMATION**

484 **Figure S1. Correlation of estimated alternative allele frequencies between biological**  
485 **replicates.**

486 **Figure S2. Correlation of estimated alternative allele frequencies between metagenomic**  
487 **and hybrid capture data.**

488 **Figure S3. Correlation between sequencing depth and detected iSNVs.**

489 **Figure S4. Number of iSNV among three codon positions.**

490 **Figure S5. Haplotype frequency of proximal iSNVs within the gastrointestinal tract of the**  
491 **patient P01**

492

493 **Table S1. Summary of clinical samples and patients with COVID-19**

494 **Table S2. Genomic information of 32 SARS-CoV-2 samples**

495 **Table S3. List of intra-host single nucleotide variants within 32 SARS-CoV-2 samples**

496 **Table S4. Allele frequency of iSNVs detected from metatranscriptomic and/or hybrid**  
497 **capture data**

498 **Table S5. Genetic diversity of 32 SARS-CoV-2 samples**

499 **Table S6. Genetic distance between paired samples**

500 **Table S7. Frequency of proximal iSNVs using paired-end mapped reads**

501 **Table S8. List of public genomes used for analysis**

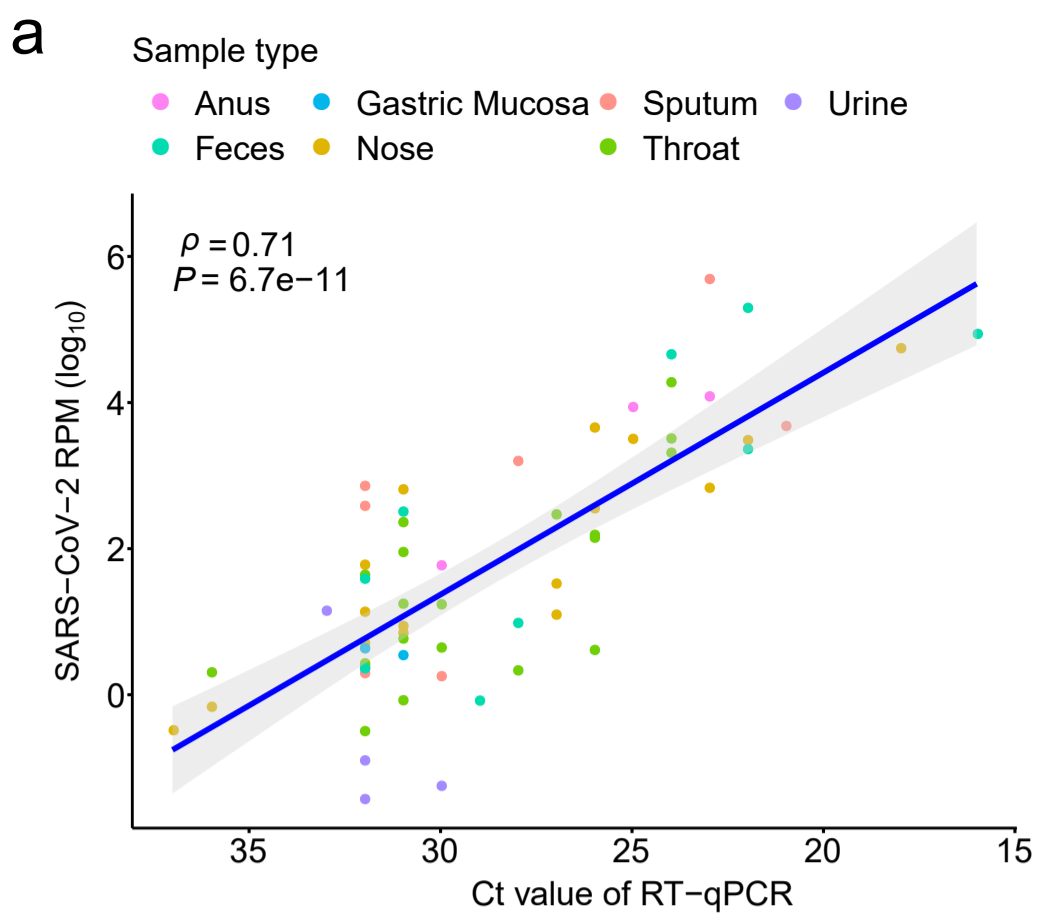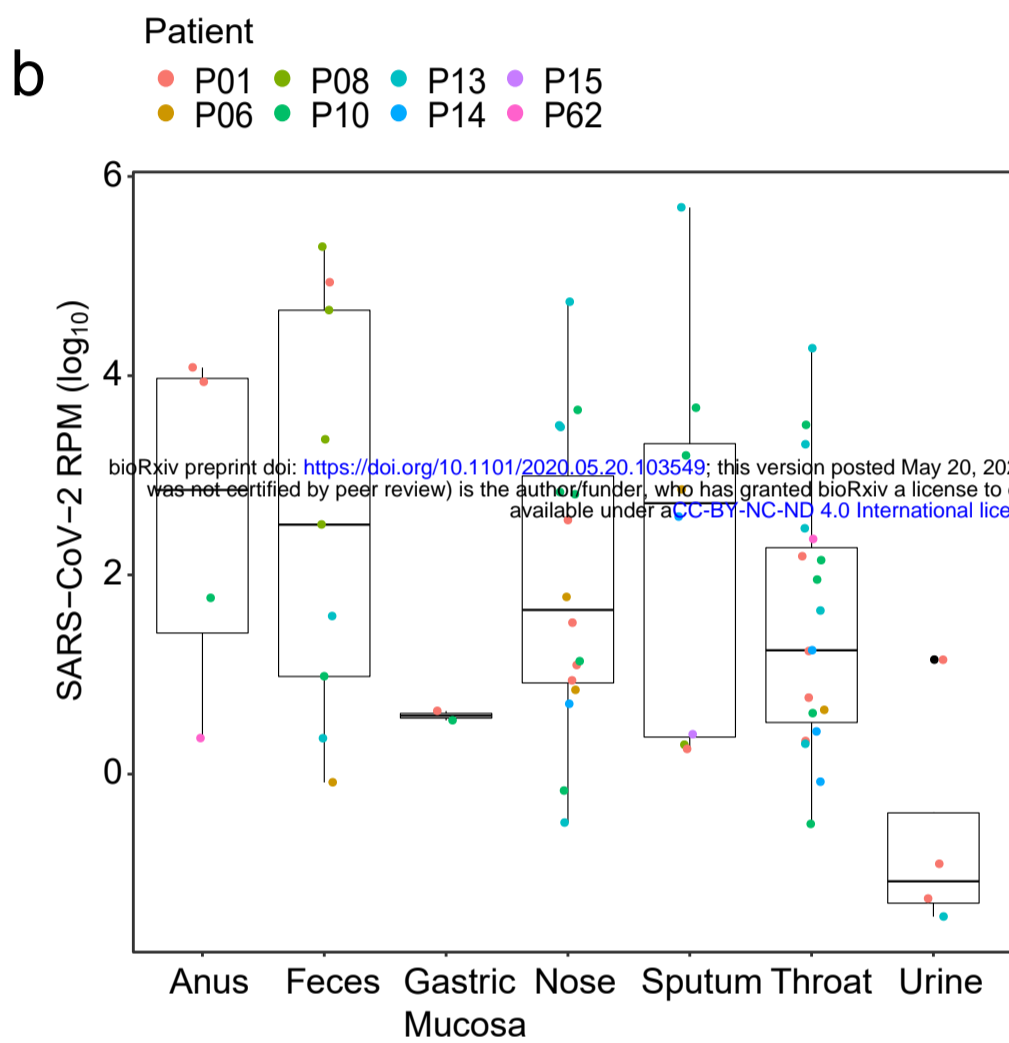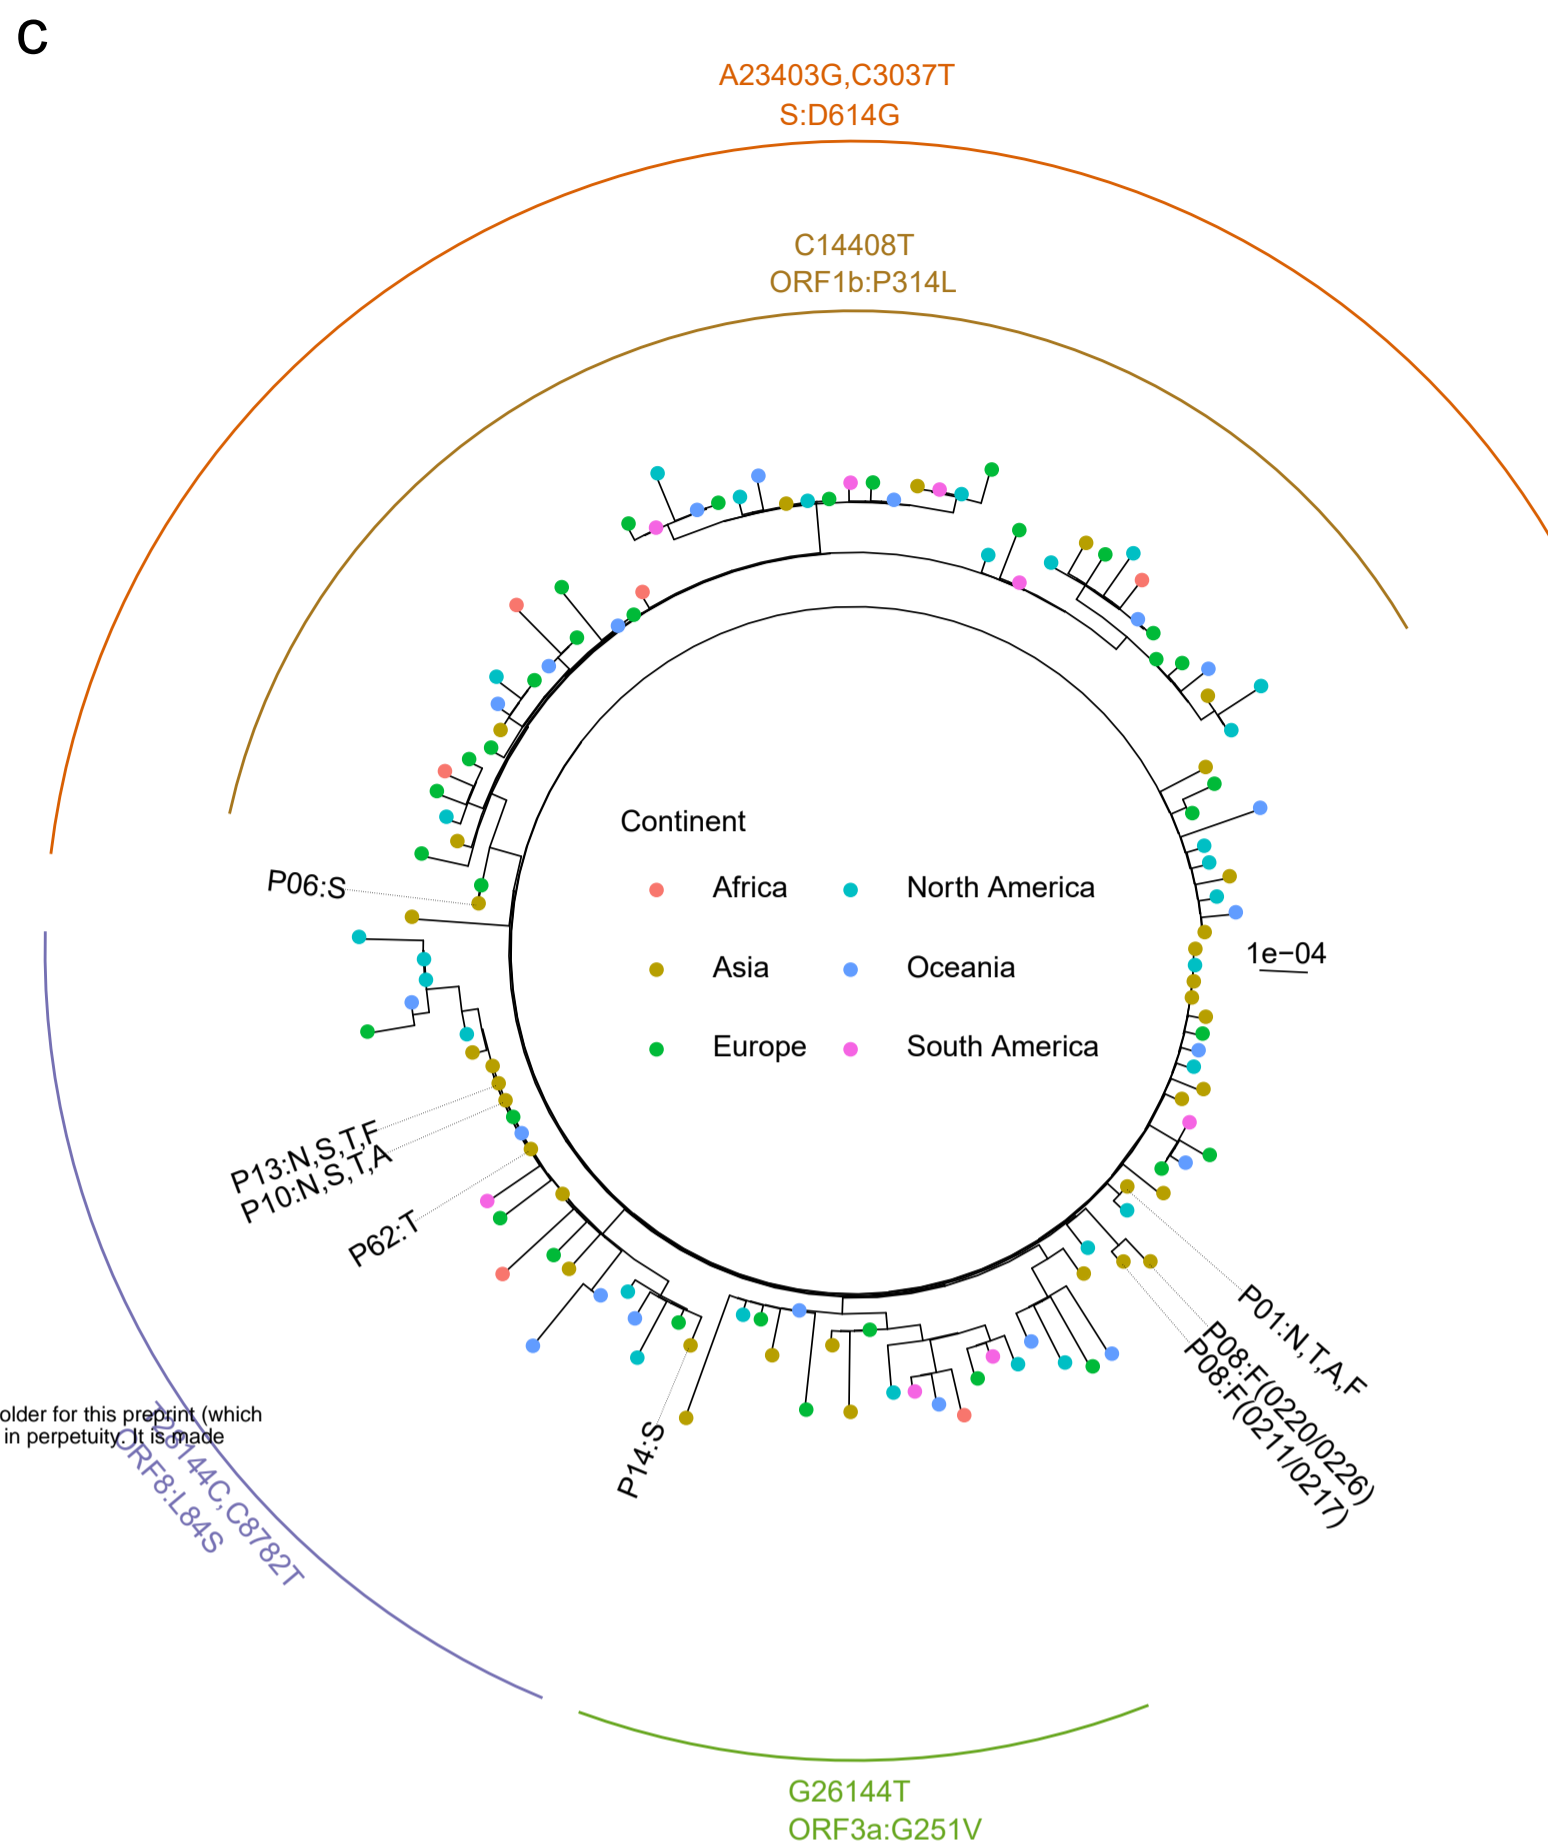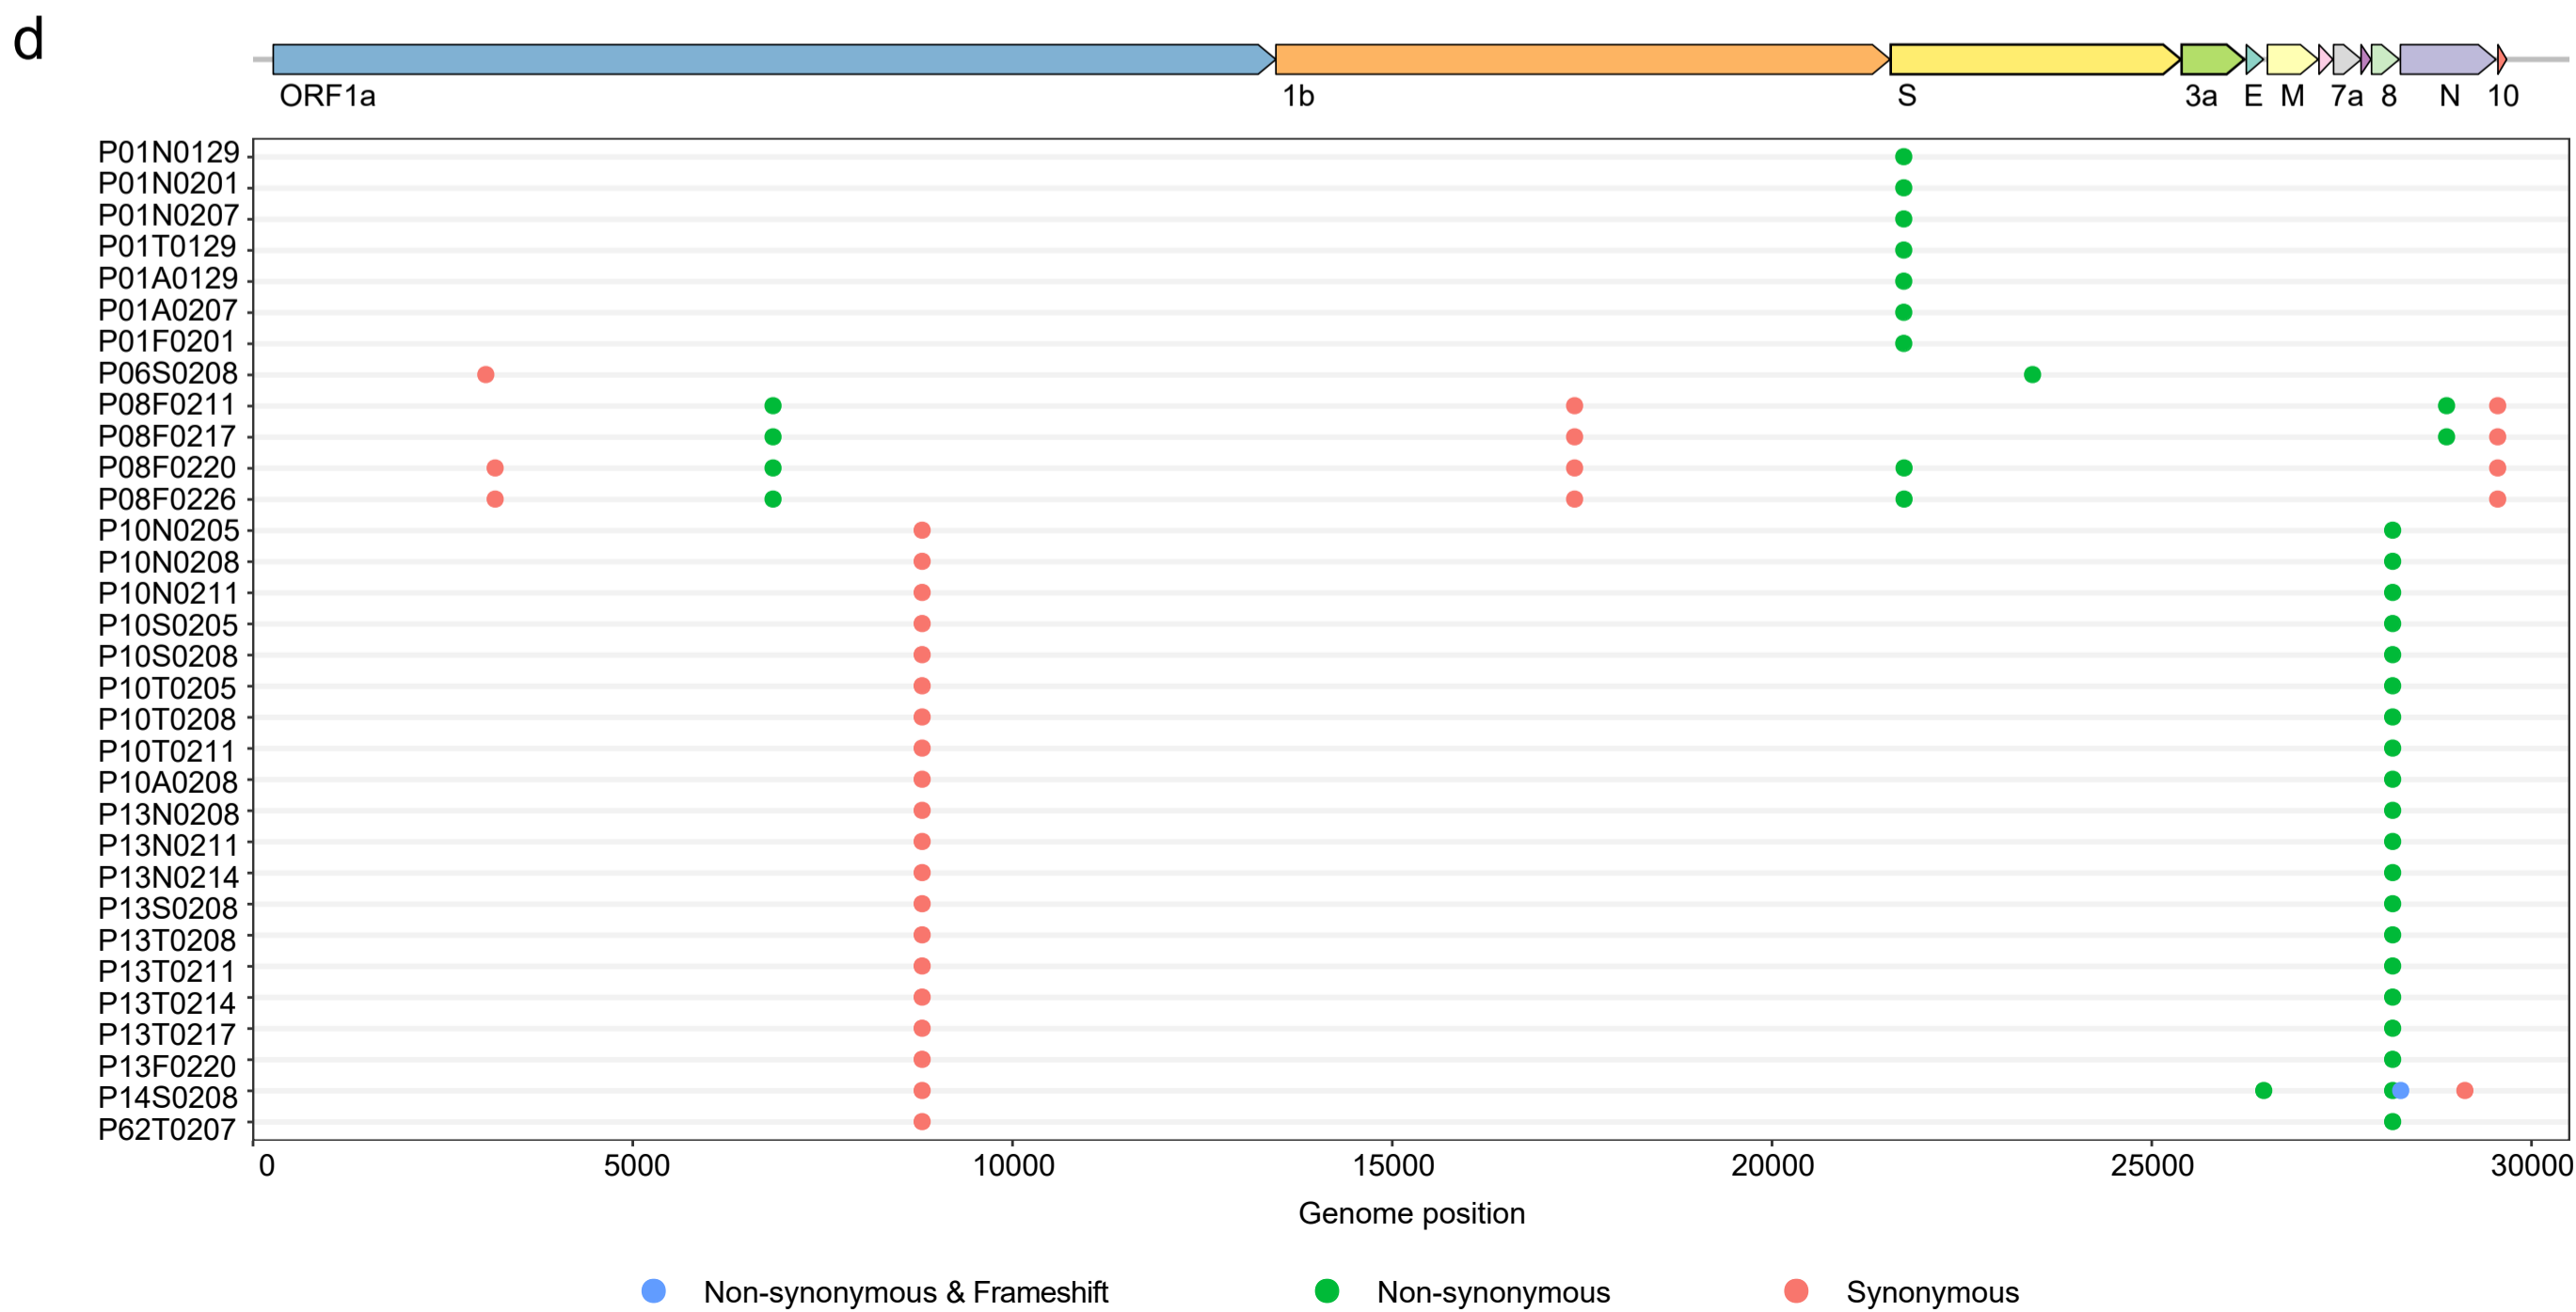

a

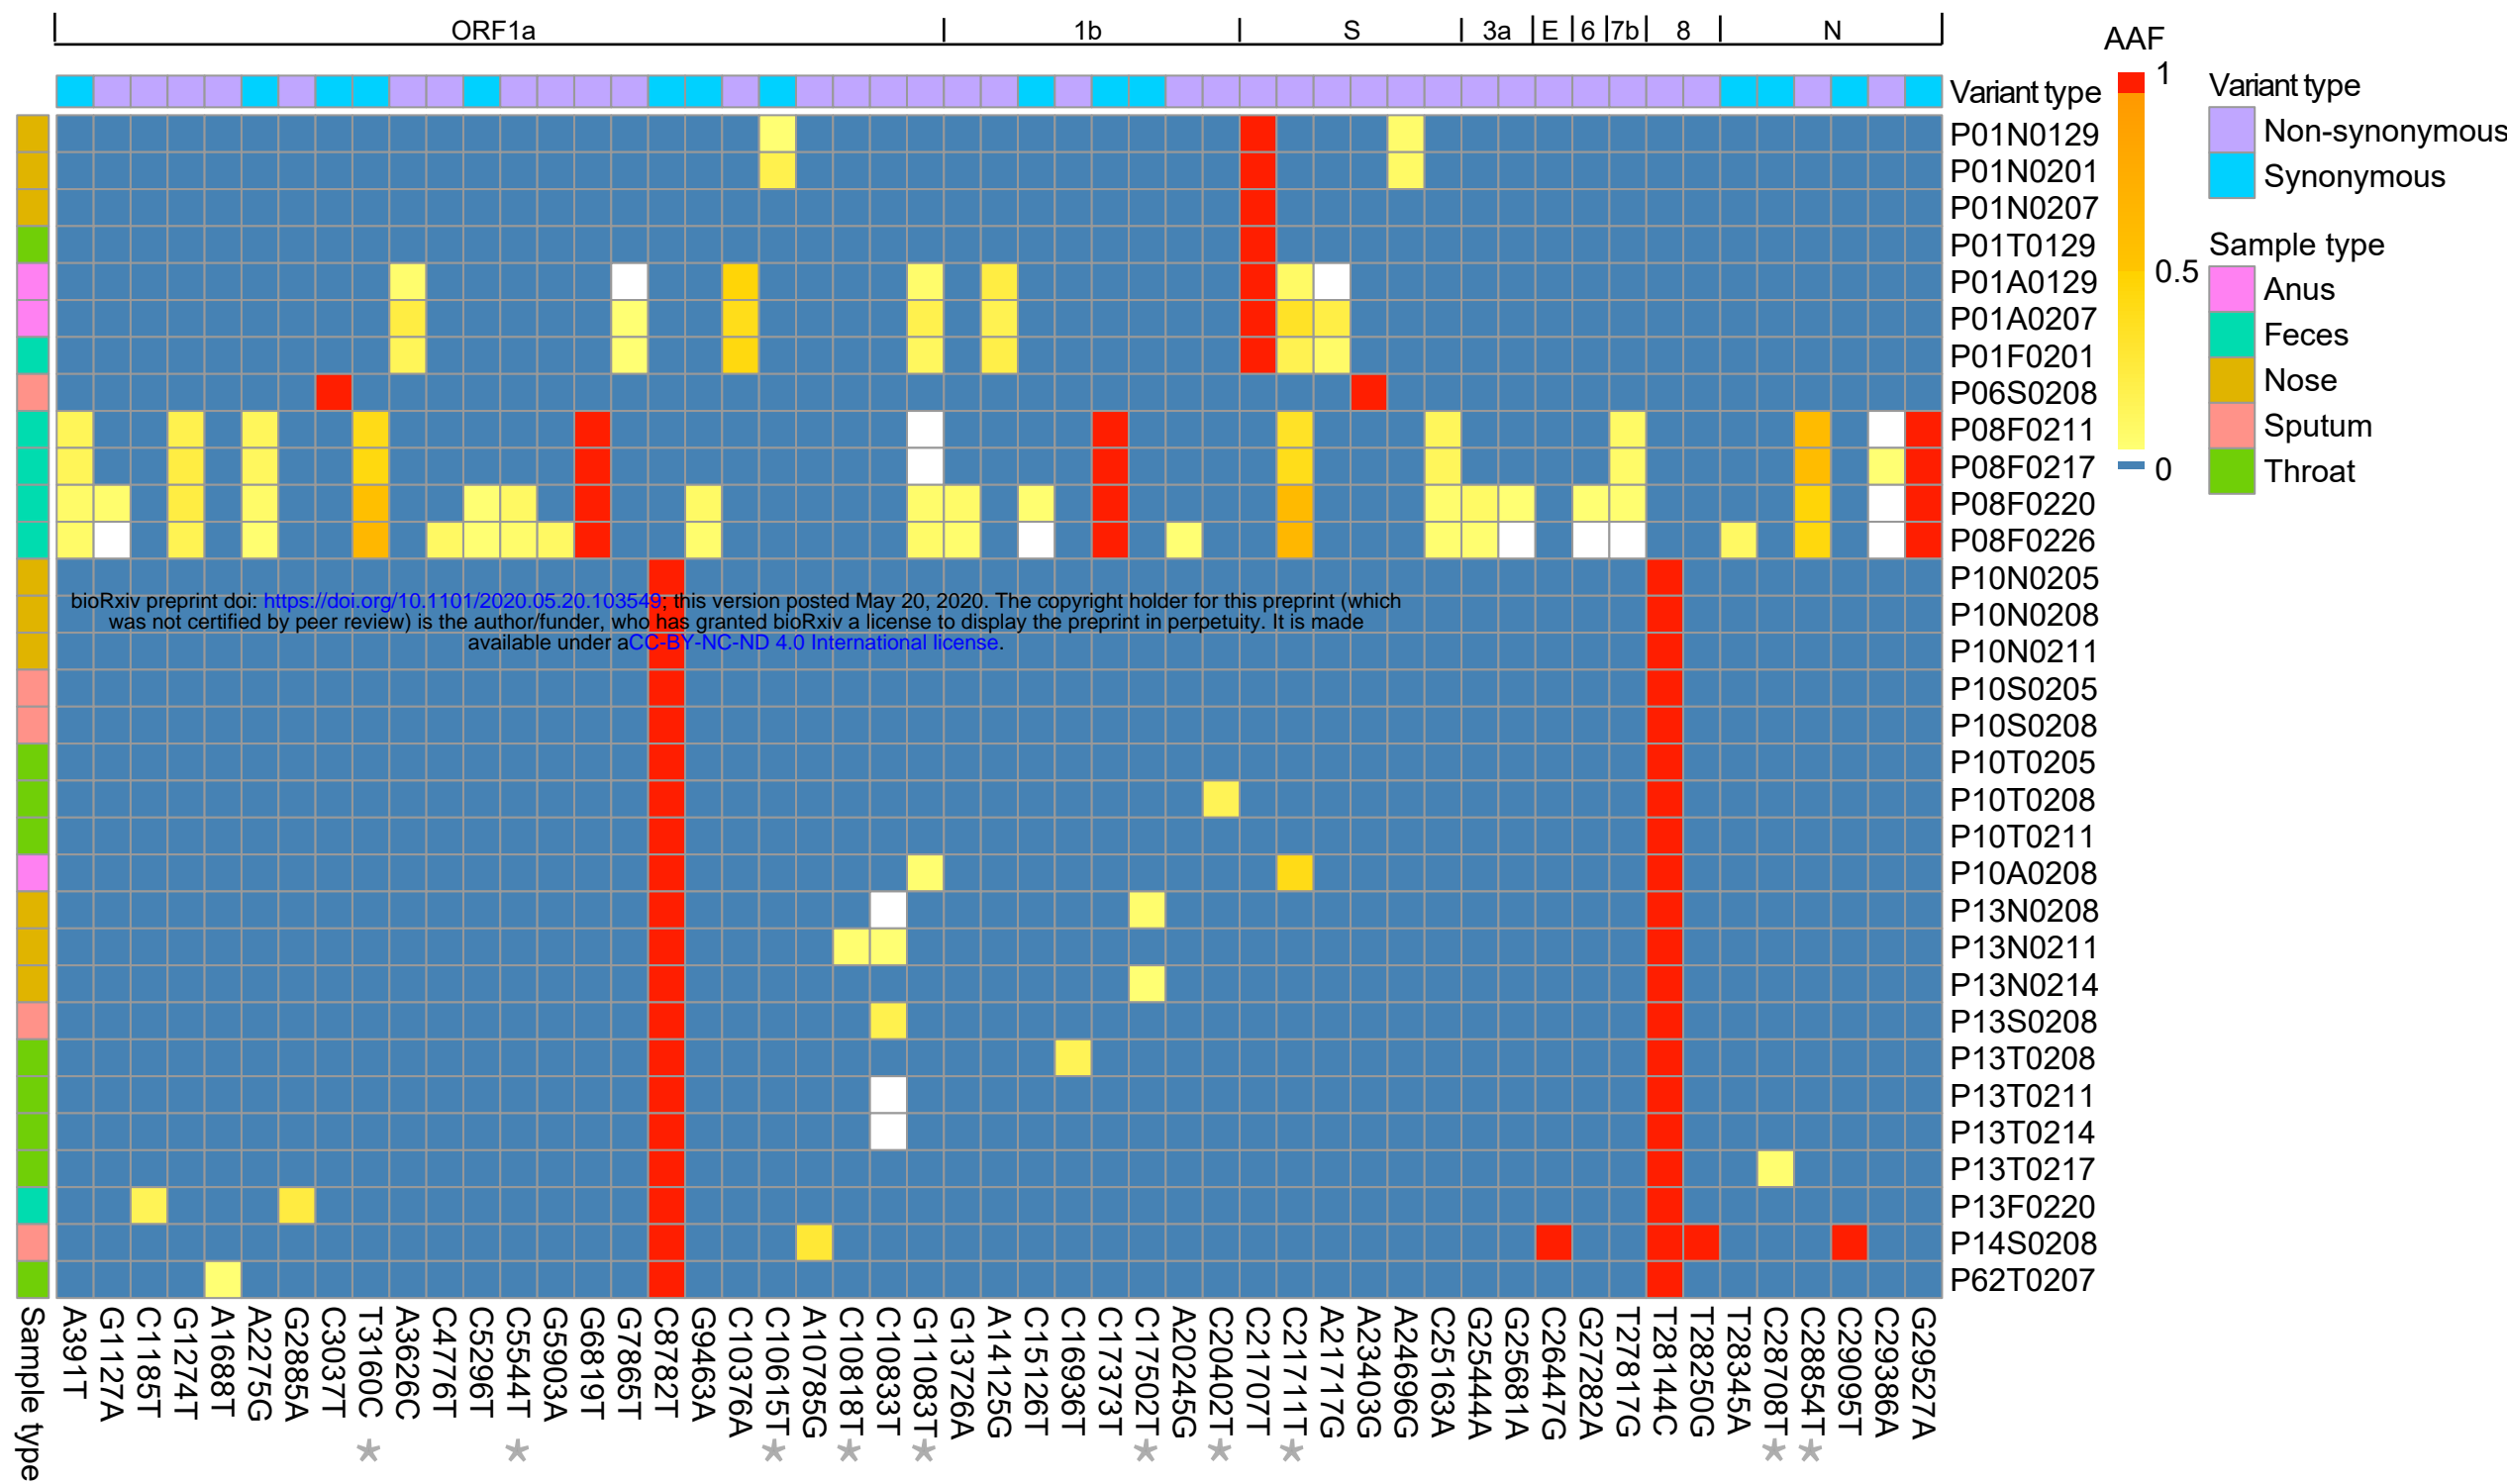

b

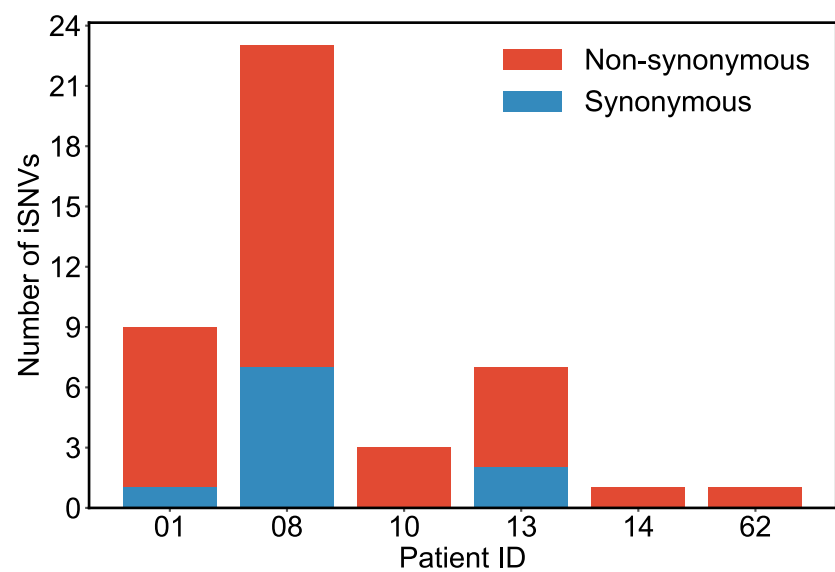

c

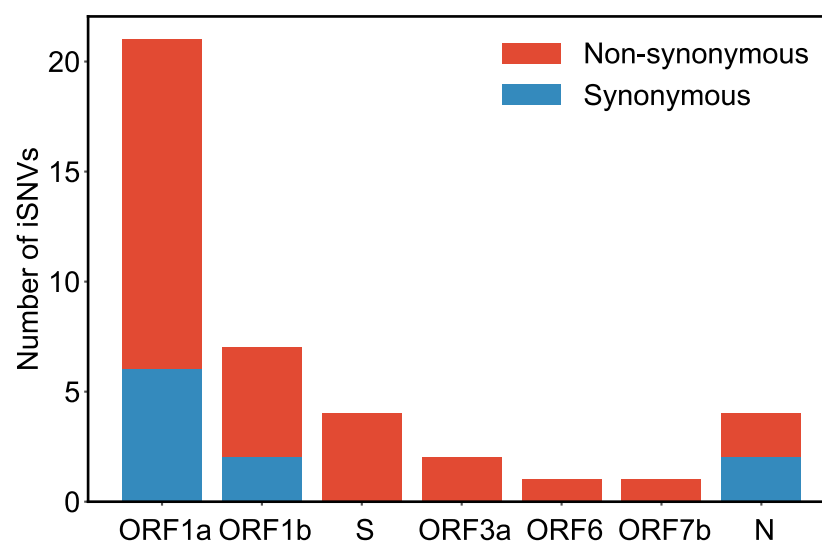

d

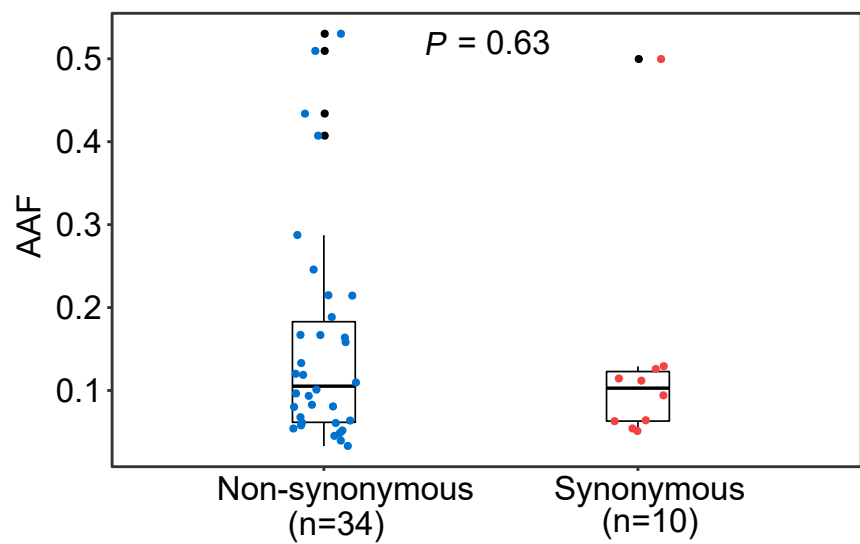

e

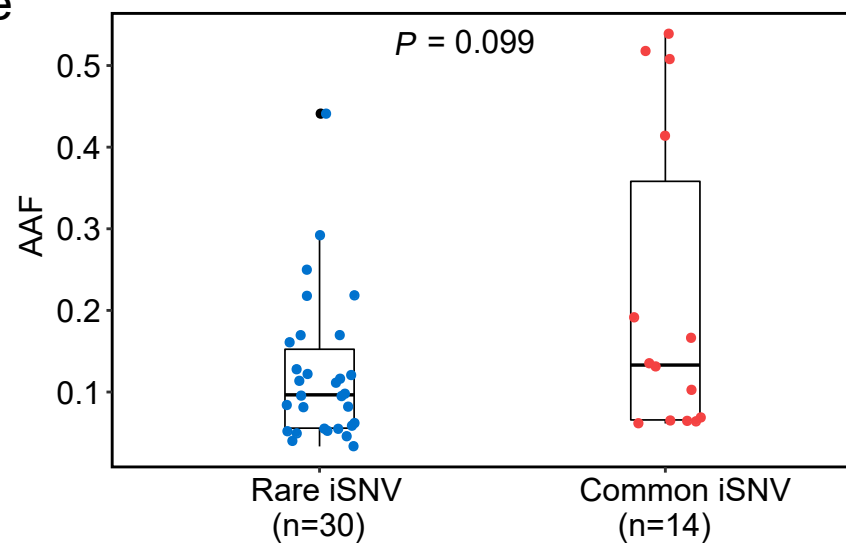

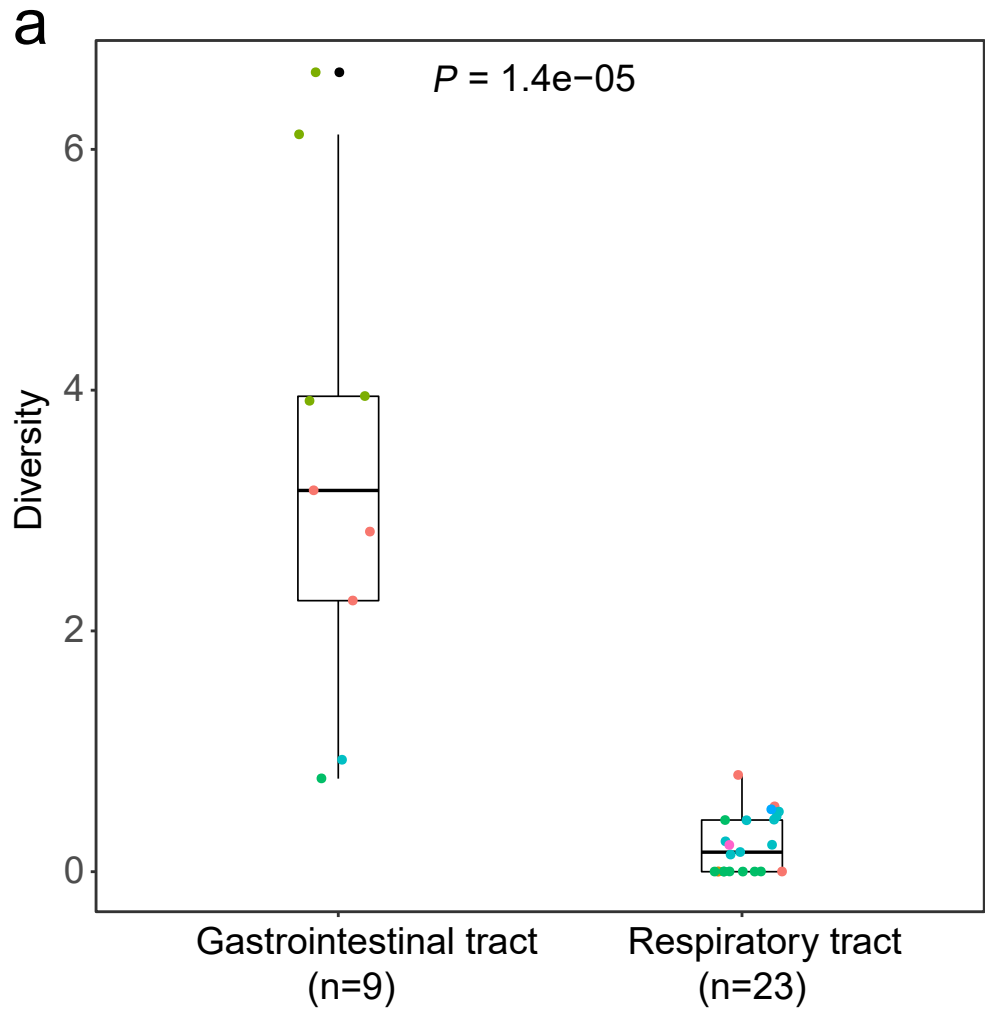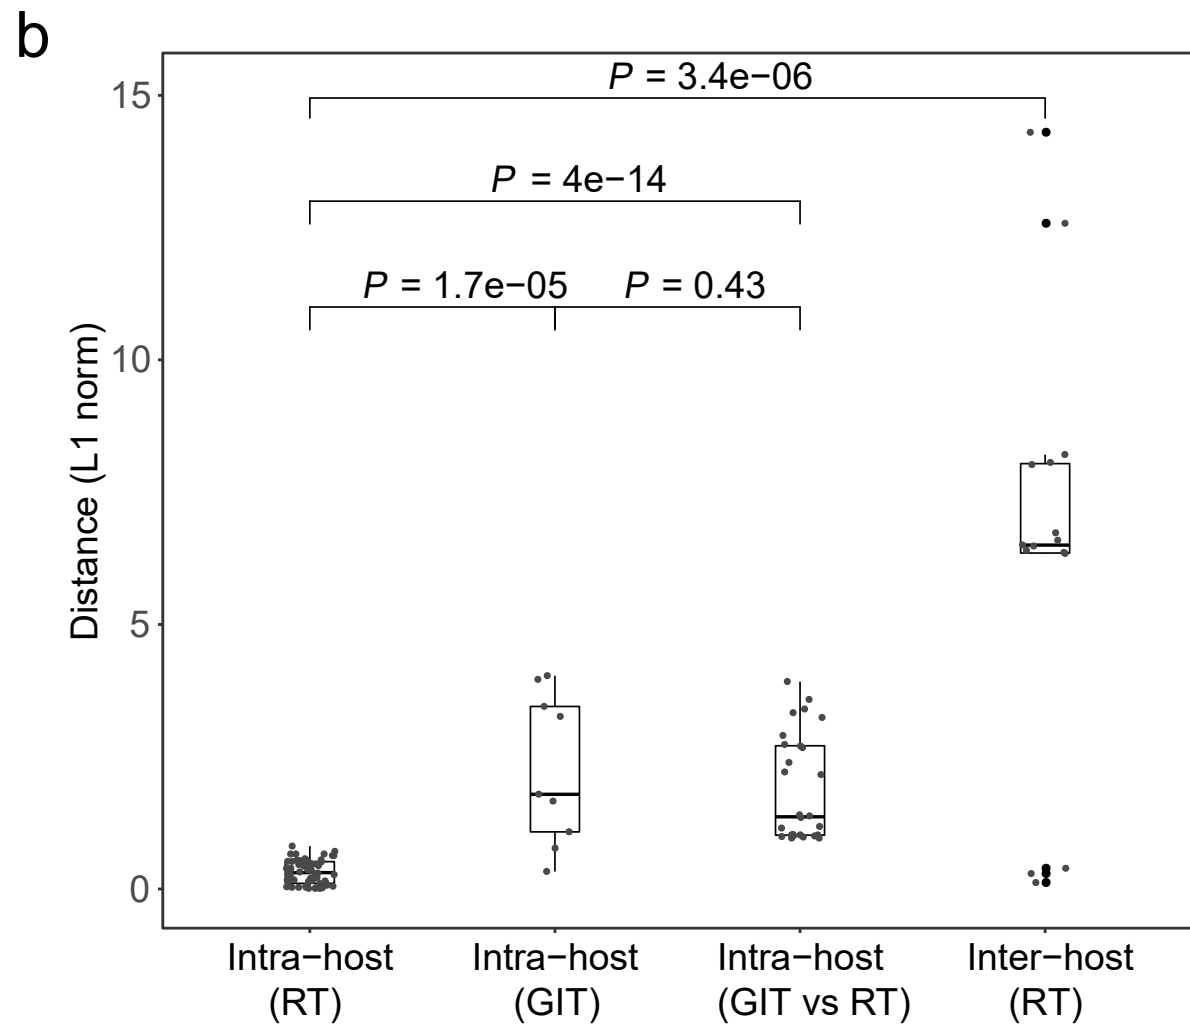



**a**

P01

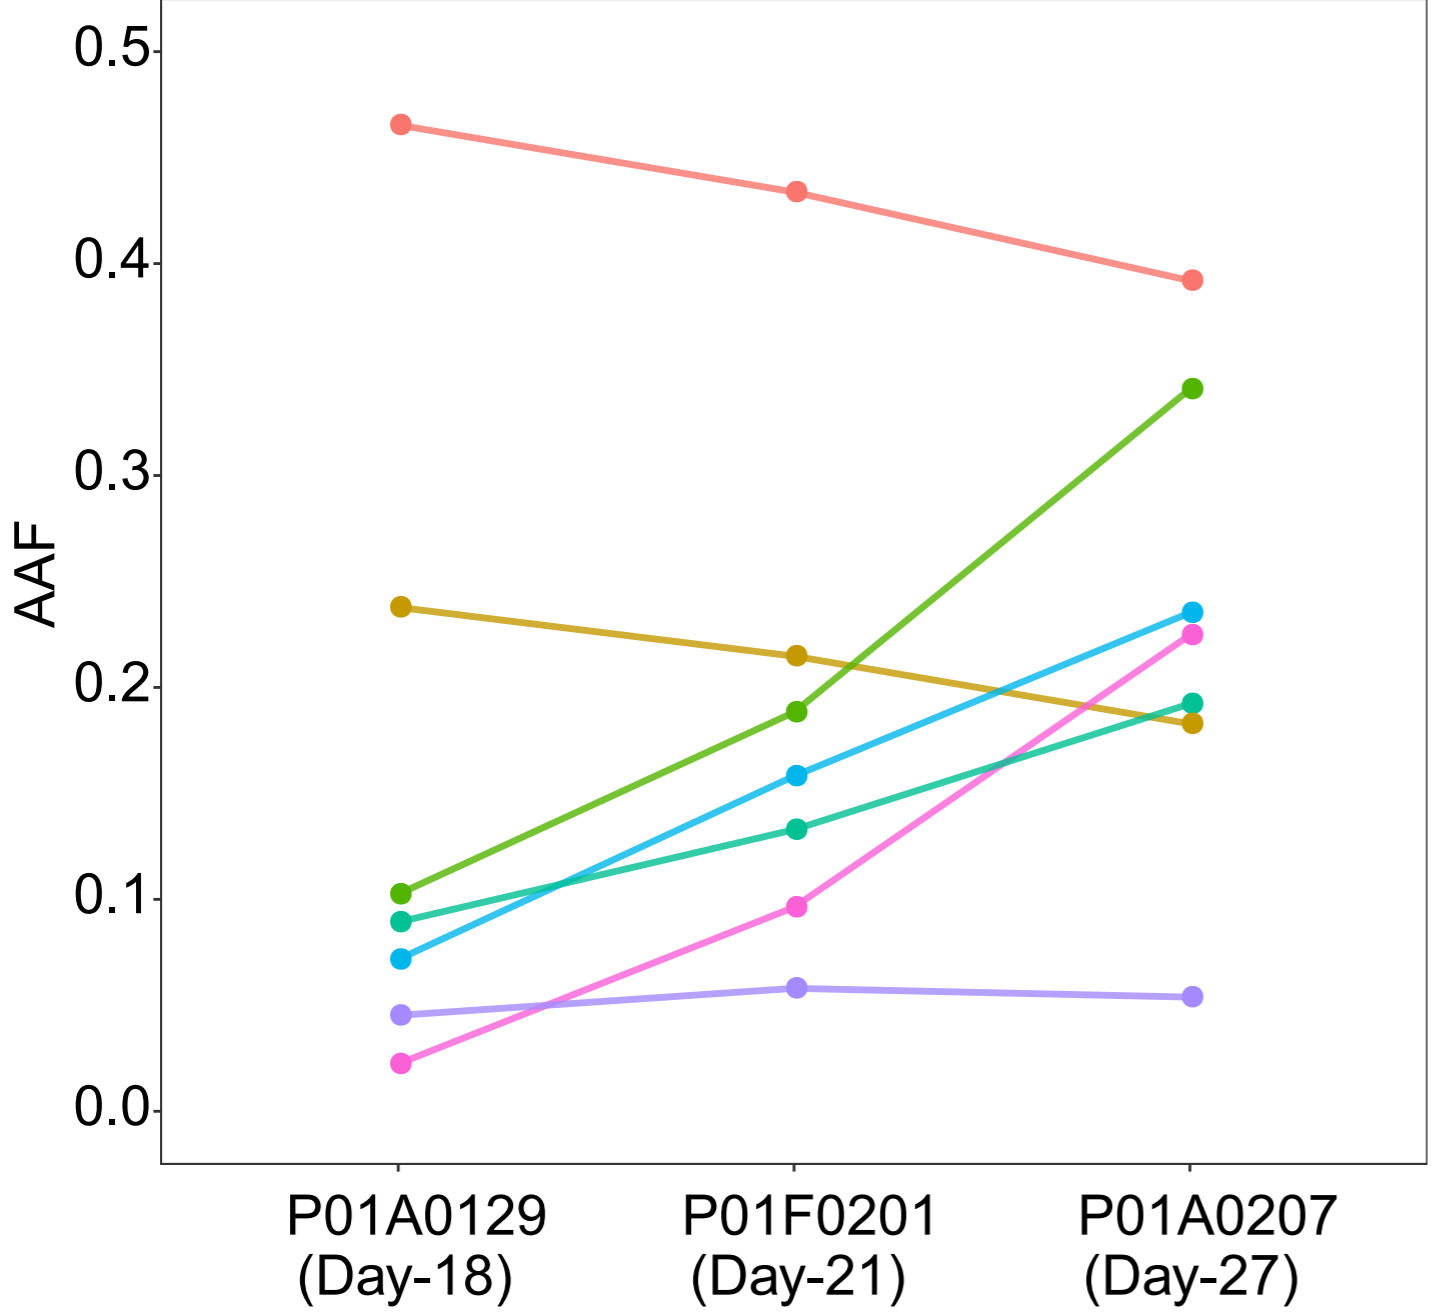

● C10376A    ● C21711T    ● A3626C    ● A21717G  
● A14125G    ● G11083T    ● G7865T

**b**

P08

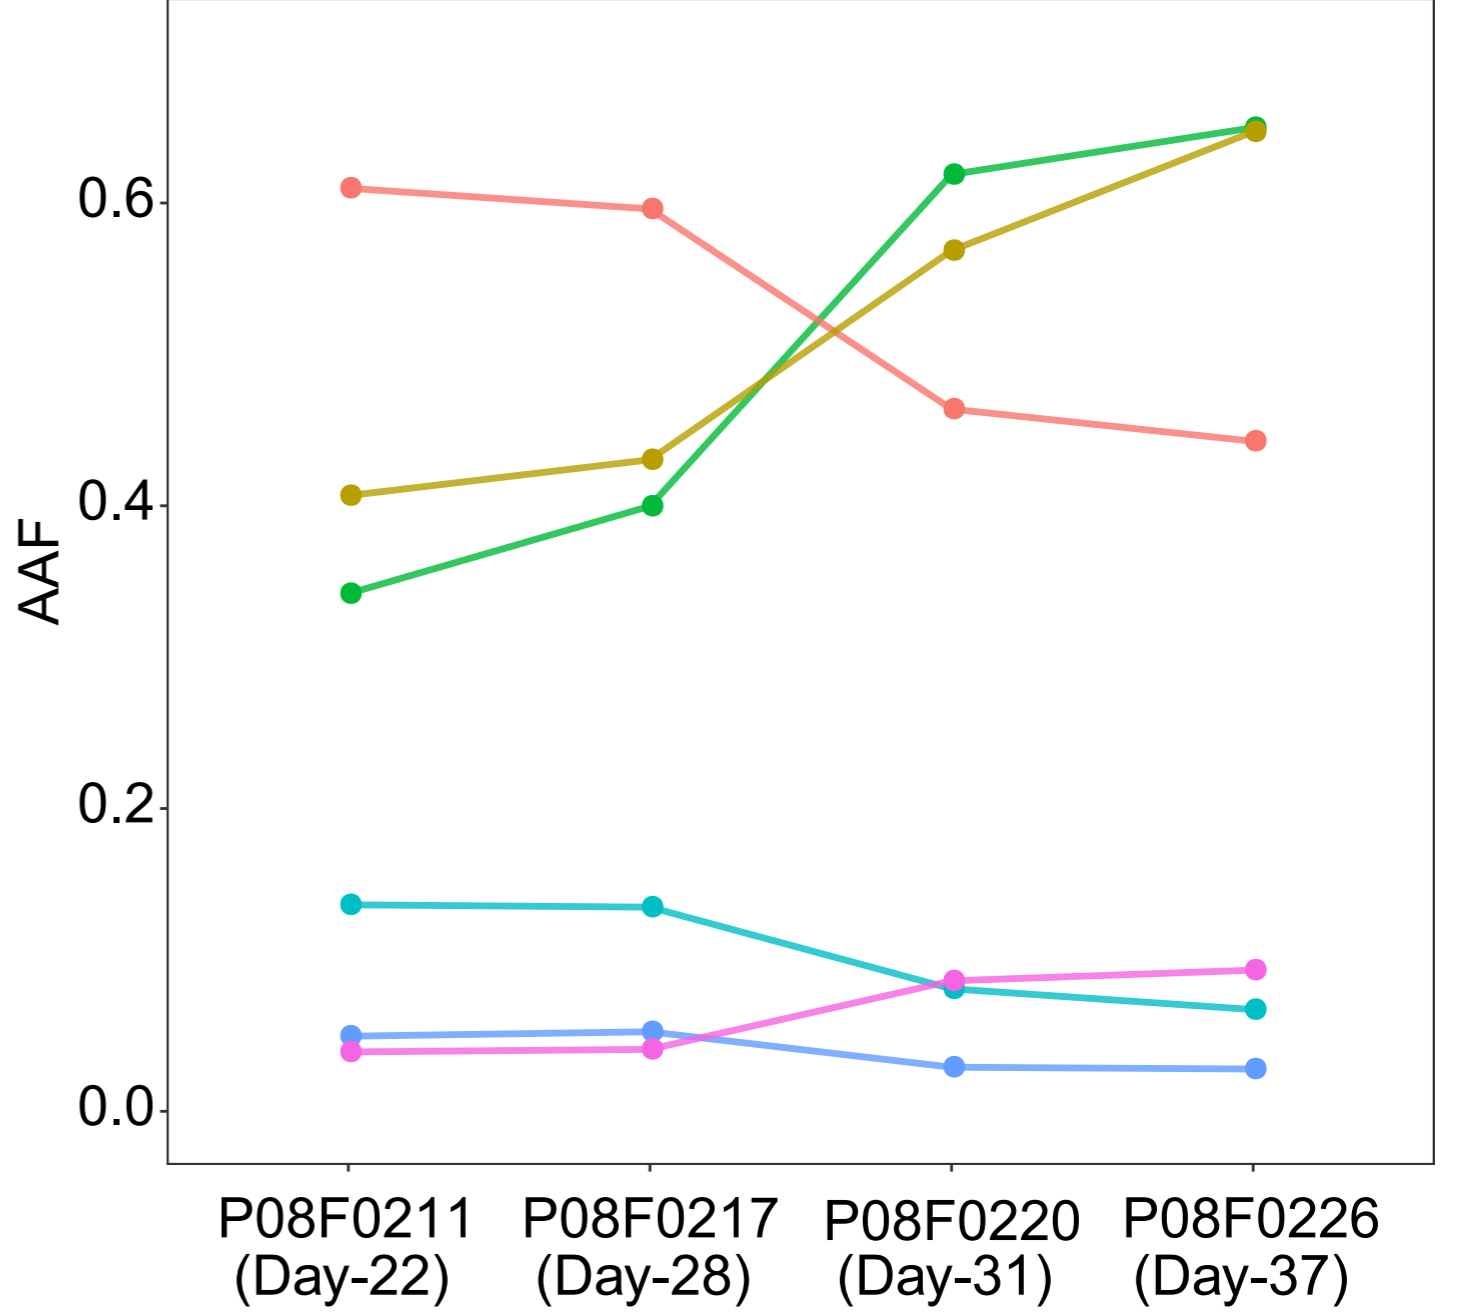

● C28854T    ● C21711T    ● C29386A  
● T3160C    ● Combined iSNVs    ● G11083T
