# Supplementary material for: Intra-host Variation and Evolutionary Dynamics of SARS-CoV-2 Population in COVID-19 Patients
Source: bioRxiv or medRxiv preprint supplement (doi:10.1101/2020.05.20.103549), 2020-05-20

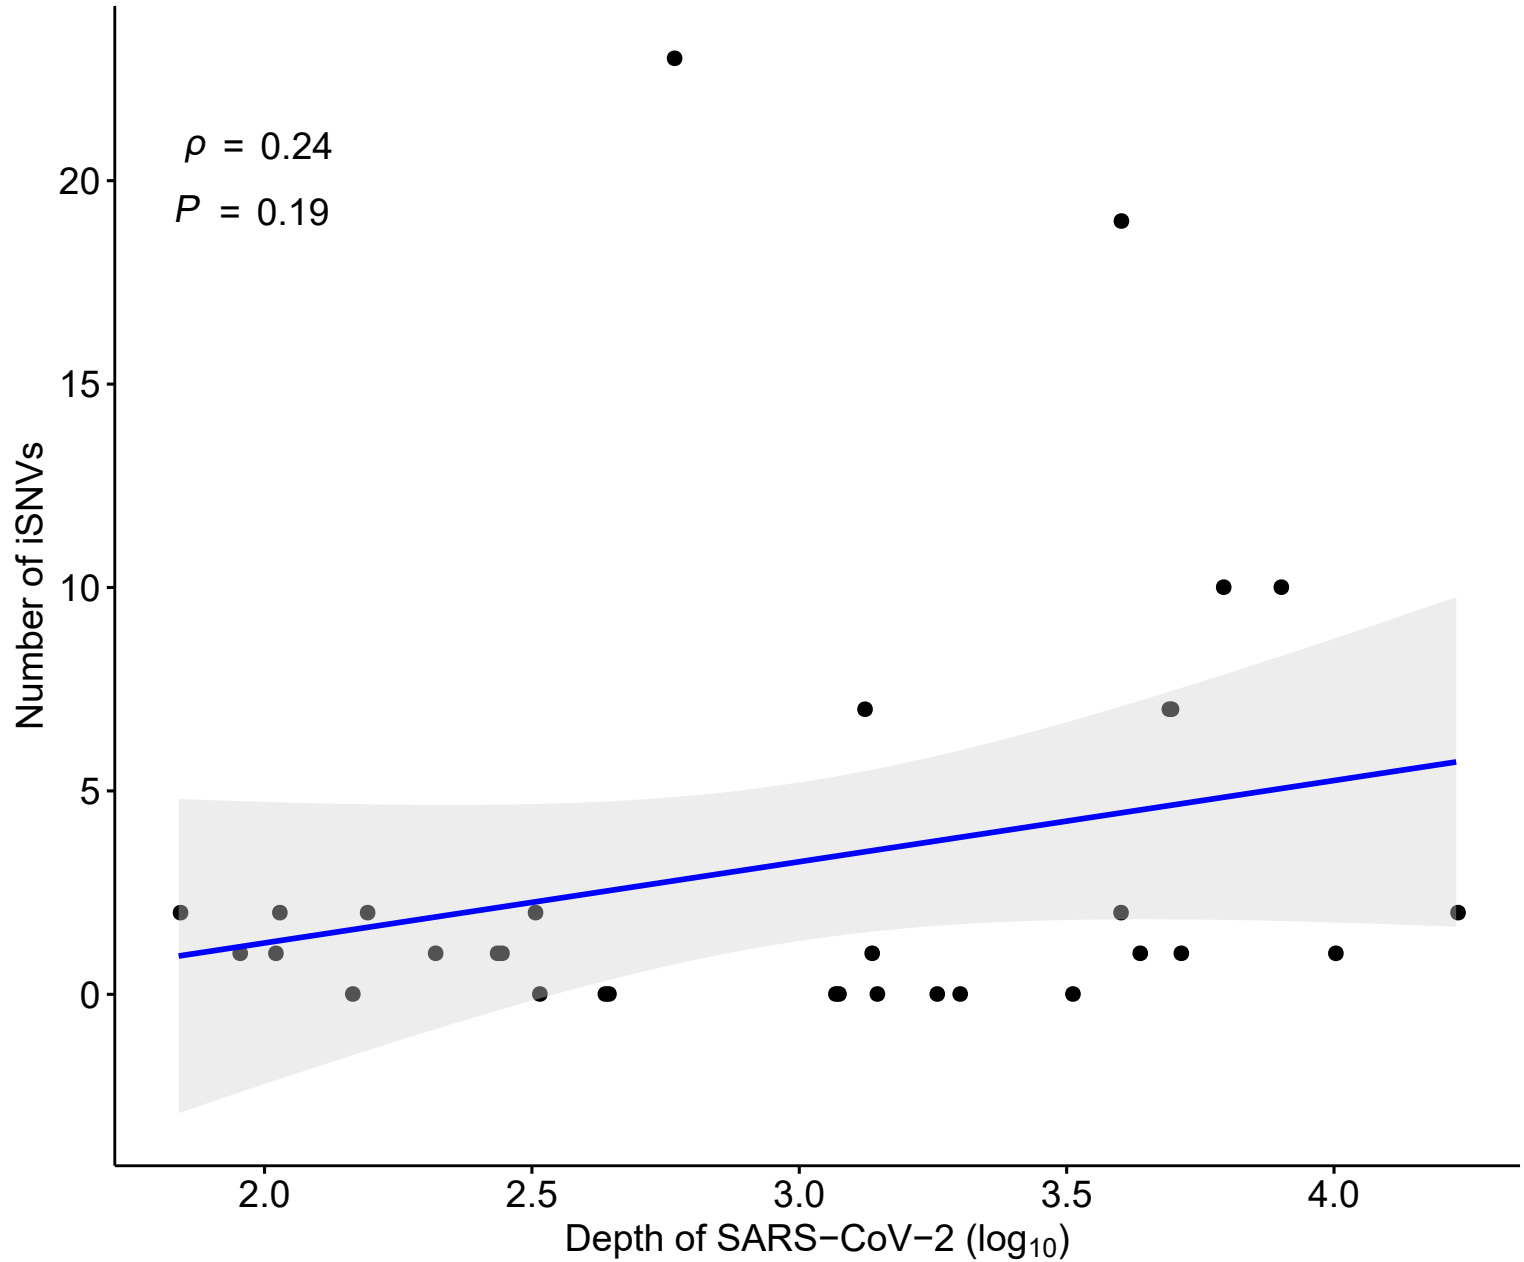

Supplement: Supplementary file [file media-3.pdf]
